# Supplementary material for: Mutations in Ovis aries TMEM154 are associated with lower small ruminant lentivirus proviral concentration in one sheep flock
Source: PubMed Central journal article supplement (PMC4140605; doi:10.1111/age.12181), 2014-06-17
Supplement: age0045-0565-SD1.pdf [file age0045-0565-SD1.pdf]

Table S1: Numbers of positive individuals by *CCR5* genotype from four flocks.

---

| <b>Flock</b>          | Montana | Idaho 2008 | Iowa | Total |
|-----------------------|---------|------------|------|-------|
| <b>DD<sup>1</sup></b> | 142     | 27         | 12   | 181   |
| <b>II<sup>1</sup></b> | 197     | 168        | 114  | 479   |
| <b>ID<sup>1</sup></b> | 317     | 135        | 75   | 527   |
| <b>Total</b>          | 656     | 330        | 201  | 1187  |

---

<sup>1</sup>DD is homozygous deletion, II is homozygous insertion and ID is heterozygous insertion/deletion
