# Supplementary material for: Mutations in Ovis aries TMEM154 are associated with lower small ruminant lentivirus proviral concentration in one sheep flock
Source: PubMed Central journal article supplement (PMC4140605; doi:10.1111/age.12181), 2014-06-17
Supplement: age0045-0565-SD2.pdf [file age0045-0565-SD2.pdf]

Table S2

All animals included in the study with breed, mean qPCR, age, CCR5 genotype and TMEM154 diplotype

| <b>Animal Number</b> | <b>Breed</b> | <b>Flock region</b> | <b>age</b> | <b>Mean qPCR</b> | <b>TMEM154 Diplotype</b> | <b>CCR5 Genotype</b> |
|----------------------|--------------|---------------------|------------|------------------|--------------------------|----------------------|
| 1                    | Polypay      | lowa                | 4          | 245              | 13                       | II                   |
| 2                    | Polypay      | lowa                | 3          | .                | 11                       | ID                   |
| 3                    | Polypay      | lowa                | 4          | .                | 11                       | II                   |
| 4                    | Polypay      | lowa                | 3          | 125              | 13                       | ID                   |
| 5                    | Polypay      | lowa                | 3          | 63               | 13                       | ID                   |
| 6                    | Polypay      | lowa                | 3          | 825              | 13                       | ID                   |
| 7                    | Polypay      | lowa                | 3          | .                | 11                       | II                   |
| 8                    | Polypay      | lowa                | 3          | 8.97             | 11                       | II                   |
| 9                    | Polypay      | lowa                | 3          | 3..4             | 12                       | II                   |
| 10                   | Polypay      | lowa                | 3          | .                | 11                       | II                   |
| 11                   | Polypay      | lowa                | 3          | 19.6             | 11                       | II                   |
| 12                   | Polypay      | lowa                | 5          | .                | 11                       | II                   |
| 13                   | Polypay      | lowa                | 1          | 14.7             | 12                       | ID                   |
| 14                   | Polypay      | lowa                | 4          | .                | 11                       | DD                   |
| 15                   | Polypay      | lowa                | 4          | 88.6             | 13                       | ID                   |
| 16                   | Polypay      | lowa                | 5          | .                | 11                       | ID                   |
| 17                   | Polypay      | lowa                | 5          | .                | 11                       | ID                   |
| 18                   | Polypay      | lowa                | 3          | 11               | 13                       | ID                   |
| 19                   | Polypay      | lowa                | 7          | 179              | 11                       | ID                   |
| 20                   | Polypay      | lowa                | 4          | .                | 11                       | II                   |
| 21                   | Polypay      | lowa                |            | .                | 11                       | II                   |
| 22                   | Polypay      | lowa                | 3          | .                | 11                       | II                   |
| 23                   | Polypay      | lowa                | 3          | 6.4              | 11                       | II                   |
| 24                   | Polypay      | lowa                | 3          | 94.4             | 11                       | II                   |
| 25                   | Polypay      | lowa                | 6          | 599              | 11                       | ID                   |
| 26                   | Polypay      | lowa                | 3          | 571              | 13                       | II                   |
| 27                   | Polypay      | lowa                | 5          | 42.2             | 11                       | II                   |
| 28                   | Polypay      | lowa                | 4          | 14.1             | 11                       | II                   |
| 29                   | Polypay      | lowa                | 3          | .                | 11                       | II                   |
| 30                   | Polypay      | lowa                | 4          | 111              | 11                       | II                   |
| 31                   | Polypay      | lowa                | 4          | 829              | 12                       | ID                   |
| 32                   | Polypay      | lowa                | 5          | .                | 11                       | DD                   |
| 33                   | Polypay      | lowa                | 3          | .                | 11                       | ID                   |
| 34                   | Polypay      | lowa                |            | 2.22             | 11                       | DD                   |
| 35                   | Polypay      | lowa                | 5          | 86               | 11                       | II                   |
| 36                   | Polypay      | lowa                | 4          | 356              | 11                       | ID                   |
| 37                   | Polypay      | lowa                | 4          | 146              | 11                       | DD                   |

|    |         |      |   |      |    |    |
|----|---------|------|---|------|----|----|
| 38 | Polypay | Iowa | 3 | 235  | 13 | II |
| 39 | Polypay | Iowa | 4 | 133  | 13 | II |
| 40 | Polypay | Iowa | 3 | 29.8 | 12 | II |
| 41 | Polypay | Iowa | 4 | .    | 11 | ID |
| 42 | Polypay | Iowa | 3 | .    | 11 | II |
| 43 | Polypay | Iowa | 5 | 14   | 23 | II |
| 44 | Polypay | Iowa | 3 | .    | 11 | II |
| 45 | Polypay | Iowa | 3 | 23.4 | 13 | ID |
| 46 | Polypay | Iowa | 3 | .    | 11 | II |
| 47 | Polypay | Iowa | 1 | 131  | 11 | DD |
| 48 | Polypay | Iowa | 3 | 113  | 12 | II |
| 49 | Polypay | Iowa | 3 | .    | 11 | II |
| 50 | Polypay | Iowa | 3 | 61.2 | 13 | II |
| 51 | Polypay | Iowa | 4 | 136  | 11 | ID |
| 52 | Polypay | Iowa | 3 | .    |    | II |
| 53 | Polypay | Iowa | 3 | .    |    | II |
| 54 | Polypay | Iowa | 3 | 333  |    | II |
| 55 | Polypay | Iowa | 5 | .    | 11 | DD |
| 56 | Polypay | Iowa | 3 | 49   | 13 | II |
| 57 | Polypay | Iowa | 4 | .    | 11 | II |
| 58 | Polypay | Iowa | 6 | 1.4. | 33 | ID |
| 59 | Polypay | Iowa | 3 | .    | 11 | II |
| 60 | Polypay | Iowa | 5 | 584  | 11 | II |
| 61 | Polypay | Iowa | 3 | 265  | 12 | ID |
| 62 | Polypay | Iowa |   | 677  |    | DD |
| 63 | Polypay | Iowa | 5 | 65   |    | DD |
| 64 | Polypay | Iowa | 4 | 193  | 11 | ID |
| 65 | Polypay | Iowa | 3 | 3.3  | 13 | ID |
| 66 | Polypay | Iowa | 4 | .    | 11 | ID |
| 67 | Polypay | Iowa | 5 | 142  | 13 | II |
| 68 | Polypay | Iowa | 5 | 21   | 33 | II |
| 69 | Polypay | Iowa | 5 | 323  | 11 | II |
| 70 | Polypay | Iowa | 4 | 99.4 | 11 | II |
| 71 | Polypay | Iowa | 4 | .    | 11 | ID |
| 72 | Polypay | Iowa | 1 | .    | 11 | ID |
| 73 | Polypay | Iowa | 4 | .    | 11 | DD |
| 74 | Polypay | Iowa | 3 | 358  | 13 | ID |
| 75 | Polypay | Iowa | 4 | 868  | 11 | DD |
| 76 | Polypay | Iowa | 1 | .    | 11 | ID |
| 77 | Polypay | Iowa | 3 | .    | 11 | II |
| 78 | Polypay | Iowa | 4 | .    | 12 | II |
| 79 | Polypay | Iowa | 3 | 16.6 |    | ID |
| 80 | Polypay | Iowa | 4 | .    | 11 | ID |

|     |         |      |   |      |    |    |
|-----|---------|------|---|------|----|----|
| 81  | Polypay | lowa | 3 | 32.2 | 11 | II |
| 82  | Polypay | lowa | 3 | 61.4 | 12 | ID |
| 83  | Polypay | lowa | 3 | 119  | 11 | ID |
| 84  | Polypay | lowa | 3 | .    | 11 | II |
| 85  | Polypay | lowa | 4 | 474  | 13 | ID |
| 86  | Polypay | lowa | 4 | 43.6 | 11 | II |
| 87  | Polypay | lowa | 2 | 1.95 | 11 | II |
| 88  | Polypay | lowa | 2 | .    | 11 | ID |
| 89  | Polypay | lowa | 4 | .    | 13 | ID |
| 90  | Polypay | lowa | 2 | .    | 11 | II |
| 91  | Polypay | lowa | 3 | .    | 11 | II |
| 92  | Polypay | lowa | 1 | .    | 11 | II |
| 93  | Polypay | lowa | 4 | 126  | 13 | ID |
| 94  | Polypay | lowa | 4 | 117  | 13 | II |
| 95  | Polypay | lowa | 4 | 562  | 11 | II |
| 96  | Polypay | lowa | 3 | .    | 11 | II |
| 97  | Polypay | lowa | 4 | 415  | 12 | ID |
| 98  | Polypay | lowa | 2 | 6.58 | 11 | II |
| 99  | Polypay | lowa | 4 | 192  | 13 | II |
| 100 | Polypay | lowa | 2 | .    | 11 | II |
| 101 | Polypay | lowa | 1 | 153  | 13 | II |
| 102 | Polypay | lowa | 1 | .    | 11 | II |
| 103 | Polypay | lowa | 4 | .    | 11 | ID |
| 104 | Polypay | lowa | 1 | .    | 11 | II |
| 105 | Polypay | lowa | 1 | 4..1 | 12 | II |
| 106 | Polypay | lowa | 1 | .    | 12 | II |
| 107 | Polypay | lowa | 1 | .    | 11 | II |
| 108 | Polypay | lowa | 1 | 867  | 11 | ID |
| 109 | Polypay | lowa | 4 | 268  | 13 | II |
| 110 | Polypay | lowa | 1 | 39.3 | 13 | II |
| 111 | Polypay | lowa | 1 | 2.28 | 11 | II |
| 112 | Polypay | lowa | 3 | .    | 11 | ID |
| 113 | Polypay | lowa | 4 | .    | 11 | ID |
| 114 | Polypay | lowa | 3 | 491  | 12 | II |
| 115 | Polypay | lowa | 1 | .    | 13 | ID |
| 116 | Polypay | lowa | 1 | .    | 11 | II |
| 117 | Polypay | lowa | 1 | 353  | 12 | ID |
| 118 | Polypay | lowa | 1 | 15.8 | 12 | II |
| 119 | Polypay | lowa | 5 | 155  | 13 | II |
| 120 | Polypay | lowa | 1 | 96   | 13 | II |
| 121 | Polypay | lowa | 1 | .    | 13 | II |
| 122 | Polypay | lowa | 3 | 352  | 13 | II |
| 123 | Polypay | lowa | 1 | .    | 11 | II |

|     |         |      |   |      |    |    |
|-----|---------|------|---|------|----|----|
| 124 | Polypay | lowa | 1 | 116  | 11 | II |
| 125 | Polypay | lowa | 1 | .    | 11 | II |
| 126 | Polypay | lowa | 1 | .    | 11 | II |
| 127 | Polypay | lowa | 1 | .    | 11 | II |
| 128 | Polypay | lowa | 1 | 384  | 12 | ID |
| 129 | Polypay | lowa | 2 | .    | 11 | ID |
| 130 | Polypay | lowa | 3 | .    | 11 | II |
| 131 | Polypay | lowa | 3 | 1.4. | 13 | ID |
| 132 | Polypay | lowa | 2 | 112  | 12 | II |
| 133 | Polypay | lowa | 3 | .    | 11 | II |
| 134 | Polypay | lowa | 2 | .    | 11 | II |
| 135 | Polypay | lowa | 2 | .    | 11 | DD |
| 136 | Polypay | lowa | 2 | .    | 11 | II |
| 137 | Polypay | lowa | 3 | 474  | 11 | II |
| 138 | Polypay | lowa | 4 | .    | 11 | DD |
| 139 | Polypay | lowa | 4 | .    | 11 | II |
| 140 | Polypay | lowa | 3 | 132  | 13 | II |
| 141 | Polypay | lowa | 3 | .    | 11 | II |
| 142 | Polypay | lowa | 2 | 26   | 11 | II |
| 143 | Polypay | lowa | 4 | .    | 11 | DD |
| 144 | Polypay | lowa | 4 | 121  | 13 | ID |
| 145 | Polypay | lowa | 2 | 1.5  | 13 | II |
| 146 | Polypay | lowa | 3 | 563  | 11 | II |
| 147 | Polypay | lowa | 1 | .    | 11 | II |
| 148 | Polypay | lowa | 1 | .    |    | II |
| 149 | Polypay | lowa |   | .    | 11 | ID |
| 150 | Polypay | lowa | 3 | .    |    | DD |
| 151 | Polypay | lowa | 2 | .    |    | II |
| 152 | Polypay | lowa | 1 | .    | 12 | ID |
| 153 | Polypay | lowa | 7 | 23.3 | 33 | DD |
| 154 | Polypay | lowa | 2 | 98.7 | 12 | II |
| 155 | Polypay | lowa | 6 | .    |    | DD |
| 156 | Polypay | lowa | 3 | 95.. |    | II |
| 157 | Polypay | lowa | 1 | .    |    | II |
| 158 | Polypay | lowa | 2 | 673  | 11 | ID |
| 159 | Polypay | lowa | 3 | 634  | 11 | II |
| 160 | Polypay | lowa | 1 | 6.97 | 13 | II |
| 161 | Polypay | lowa | 2 | .    | 11 | II |
| 162 | Polypay | lowa | 2 | .    | 11 | II |
| 163 | Polypay | lowa | 3 | 221  | 11 | ID |
| 164 | Polypay | lowa | 3 | .    | 11 | II |
| 165 | Polypay | lowa | 1 | 82.9 |    | ID |
| 166 | Polypay | lowa | 2 | 152  |    | II |

|     |         |      |   |      |    |    |
|-----|---------|------|---|------|----|----|
| 167 | Polypay | lowa | 2 | .    | 11 | ID |
| 168 | Polypay | lowa | 2 | 371  | 13 | II |
| 169 | Polypay | lowa | 3 | .    | 11 | II |
| 170 | Polypay | lowa | 2 | .    | 11 | II |
| 171 | Polypay | lowa | 2 | 188  | 12 | II |
| 172 | Polypay | lowa | 3 | 12.8 | 11 | ID |
| 173 | Polypay | lowa | 1 | 1.4  | 11 | ID |
| 174 | Polypay | lowa | 4 | 51.2 | 13 | II |
| 175 | Polypay | lowa | 3 | 14.. |    | ID |
| 176 | Polypay | lowa | 1 | .    | 11 | ID |
| 177 | Polypay | lowa | 1 | .    | 11 | II |
| 178 | Polypay | lowa | 2 | .    | 11 | ID |
| 179 | Polypay | lowa | 4 | 356  | 11 | ID |
| 180 | Polypay | lowa | 3 | 791  | 33 | II |
| 181 | Polypay | lowa | 2 | 927  |    | ID |
| 182 | Polypay | lowa | 3 | .    |    | ID |
| 183 | Polypay | lowa | 3 | 117  | 12 | ID |
| 184 | Polypay | lowa | 4 | 111  | 23 | II |
| 185 | Polypay | lowa | 4 | 131  | 13 | II |
| 186 | Polypay | lowa | 2 | 1.4  | 11 | II |
| 187 | Polypay | lowa | 5 | .    | 11 | DD |
| 188 | Polypay | lowa | 2 | 159  | 13 | II |
| 189 | Polypay | lowa | 4 | .    |    | DD |
| 190 | Polypay | lowa | 2 | 43.7 | 12 | II |
| 191 | Polypay | lowa | 5 | 29   | 11 | II |
| 192 | Polypay | lowa | 5 | 54.. | 11 | II |
| 193 | Polypay | lowa | 8 | 9.24 | 13 | II |
| 194 | Polypay | lowa |   | .    | 11 | ID |
| 195 | Polypay | lowa | 2 | 486  | 13 | ID |
| 196 | Polypay | lowa | 3 | 188  | 12 | II |
| 197 | Polypay | lowa | 4 | .    | 11 | ID |
| 198 | Polypay | lowa | 2 | .    | 11 | ID |
| 199 | Polypay | lowa | 6 | 2.13 | 11 | II |
| 200 | Polypay | lowa | 5 | .    | 11 | ID |
| 201 | Polypay | lowa | 5 | 316  | 11 | II |
| 202 | Polypay | lowa | 4 | 231  | 13 | ID |
| 203 | Polypay | lowa | 3 | .    | 11 | ID |
| 204 | Polypay | lowa | 3 | 1.3. | 13 | II |
| 205 | Polypay | lowa | 3 | .    | 11 | ID |
| 206 | Polypay | lowa | 1 | 9.26 | 13 | II |
| 207 | Polypay | lowa | 3 | 2.1  | 11 | ID |
| 208 | Polypay | lowa | 1 | .    | 11 | II |
| 209 | Polypay | lowa | 1 | .    | 11 | II |

|     |         |      |   |       |    |    |
|-----|---------|------|---|-------|----|----|
| 210 | Polypay | Iowa | 2 | .     | 12 | II |
| 211 | Polypay | Iowa | 4 | 8.81  | 11 | ID |
| 212 | Polypay | Iowa | 4 | 319   | 12 | ID |
| 213 | Polypay | Iowa | 2 | 183   | 11 | II |
| 214 | Polypay | Iowa | 1 | .     | 11 | II |
| 215 | Polypay | Iowa | 1 | .     | 11 | ID |
| 216 | Polypay | Iowa | 3 | 2.9   | 11 | II |
| 217 | Polypay | Iowa | 4 | .     | 11 | II |
| 218 | Polypay | Iowa | 2 | .     | 11 | II |
| 219 | Polypay | Iowa | 4 | 521   | 12 | II |
| 220 | Polypay | Iowa | 4 | .     | 11 | II |
| 221 | Polypay | Iowa | 5 | 223   | 11 | ID |
| 222 | Polypay | Iowa | 4 | 141   |    | DD |
| 223 | Polypay | Iowa | 3 | .     | 11 | ID |
| 224 | Polypay | Iowa | 3 | 324   | 13 | ID |
| 225 | Polypay | Iowa | 4 | 147   | 13 | II |
| 226 | Polypay | Iowa | 4 | 889   | 11 | II |
| 227 | Polypay | Iowa | 4 | 125   | 13 | II |
| 228 | Polypay | Iowa | 3 | 355   | 12 | II |
| 229 | Polypay | Iowa | 4 | 131   | 11 | II |
| 230 | Polypay | Iowa | 2 | .     | 11 | II |
| 231 | Polypay | Iowa | 8 | 22... | 11 | ID |
| 232 | Polypay | Iowa | 4 | .     | 11 | II |
| 233 | Polypay | Iowa | 5 | 651   | 12 | ID |
| 234 | Polypay | Iowa | 4 | 313   | 11 | ID |
| 235 | Polypay | Iowa |   | .     | 11 | ID |
| 236 | Polypay | Iowa | 1 | .     | 11 | II |
| 237 | Polypay | Iowa | 3 | 4.28  | 11 | II |
| 238 | Polypay | Iowa |   | 318   | 11 | II |
| 239 | Polypay | Iowa | 5 | 43.2  | 13 | II |
| 240 | Polypay | Iowa | 2 | 48    | 13 | ID |
| 241 | Polypay | Iowa | 3 | 142   | 12 | II |
| 242 | Polypay | Iowa | 5 | 213   |    | II |
| 243 | Polypay | Iowa | 8 | 6.76  | 11 | II |
| 244 | Polypay | Iowa | 5 | .     | 11 | DD |
| 245 | Polypay | Iowa | 2 | 16    | 11 | II |
| 246 | Polypay | Iowa | 2 | .     | 11 | ID |
| 247 | Polypay | Iowa | 3 | .     | 11 | DD |
| 248 | Polypay | Iowa | 4 | .     | 11 | II |
| 249 | Polypay | Iowa | 4 | 397   | 12 | II |
| 250 | Polypay | Iowa | 4 | 226   | 11 | ID |
| 251 | Polypay | Iowa | 4 | 69    | 11 | ID |
| 252 | Polypay | Iowa | 3 | .     | 11 | II |

|     |         |      |   |       |    |    |
|-----|---------|------|---|-------|----|----|
| 253 | Polypay | lowa |   | 136   |    | ID |
| 254 | Polypay | lowa | 4 | 24..  | 11 | ID |
| 255 | Polypay | lowa | 3 | .     | 11 | ID |
| 256 | Polypay | lowa | 3 | .     | 11 | II |
| 257 | Polypay | lowa | 3 | 162   | 13 | ID |
| 258 | Polypay | lowa |   | 356   | 13 | II |
| 259 | Polypay | lowa | 1 | .     | 11 | II |
| 260 | Polypay | lowa | 3 | 18.6  |    | ID |
| 261 | Polypay | lowa | 1 | .     |    | ID |
| 262 | Polypay | lowa | 2 | .     | 11 | ID |
| 263 | Polypay | lowa | 3 | .     | 12 | II |
| 264 | Polypay | lowa | 3 | 19.9  | 14 | II |
| 265 | Polypay | lowa | 2 | .     | 11 | ID |
| 266 | Polypay | lowa | 2 | .     | 11 | II |
| 267 | Polypay | lowa | 1 | 23.8  | 11 | II |
| 268 | Polypay | lowa | 2 | .     | 11 | II |
| 269 | Polypay | lowa | 1 | 2.5   | 11 | ID |
| 270 | Polypay | lowa | 6 | 23.2  | 11 | II |
| 271 | Polypay | lowa | 2 | .     | 11 | II |
| 272 | Polypay | lowa | 4 | 373   | 13 | ID |
| 273 | Polypay | lowa | 4 | 212.. | 33 | ID |
| 274 | Polypay | lowa | 3 | 2.5   | 13 | II |
| 275 | Polypay | lowa | 2 | 958   | 13 | II |
| 276 | Polypay | lowa | 2 | 58.4  | 11 | II |
| 277 | Polypay | lowa | 5 | .     |    | ID |
| 278 | Polypay | lowa | 4 | 18    | 11 | II |
| 279 | Polypay | lowa | 4 | 52.4  | 13 | II |
| 280 | Polypay | lowa | 4 | 27.1  | 11 | II |
| 281 | Polypay | lowa | 4 | 267.. | 11 | ID |
| 282 | Polypay | lowa | 6 | 147   | 11 | II |
| 283 | Polypay | lowa | 3 | .     | 11 | ID |
| 284 | Polypay | lowa | 4 | 276   | 11 | DD |
| 285 | Polypay | lowa | 4 | .     | 11 | II |
| 286 | Polypay | lowa | 3 | .     | 11 | II |
| 287 | Polypay | lowa | 3 |       | 13 | ID |
| 288 | Polypay | lowa | 3 | 1.5   | 11 | ID |
| 289 | Polypay | lowa | 3 | .     | 11 | II |
| 290 | Polypay | lowa | 4 | 62    | 11 | ID |
| 291 | Polypay | lowa |   | 45.4  | 11 | II |
| 292 | Polypay | lowa | 5 | 1.7.  | 13 | ID |
| 293 | Polypay | lowa | 5 | 123   | 11 | ID |
| 294 | Polypay | lowa | 3 | 599   | 13 | ID |
| 295 | Polypay | lowa | 4 | 69.9  | 13 | II |

|     |         |      |   |      |    |    |
|-----|---------|------|---|------|----|----|
| 296 | Polypay | Iowa | 3 | 174  | 13 | DD |
| 297 | Polypay | Iowa | 4 | 221  | 11 | ID |
| 298 | Polypay | Iowa | 4 | .    | 13 | II |
| 299 | Polypay | Iowa | 3 | 112  | 11 | II |
| 300 | Polypay | Iowa | 3 | .    | 13 | ID |
| 301 | Polypay | Iowa | 3 | 41.8 | 11 | ID |
| 302 | Polypay | Iowa | 2 | .    | 11 | II |
| 303 | Polypay | Iowa | 4 | 2.61 | 23 | ID |
| 304 | Polypay | Iowa | 3 | 972  | 12 | II |
| 305 | Polypay | Iowa | 4 | 459  | 11 | DD |
| 306 | Polypay | Iowa | 3 | 17.1 | 11 | II |
| 307 | Polypay | Iowa | 3 | .    | 11 | ID |
| 308 | Polypay | Iowa | 2 | 266  | 12 | II |
| 309 | Polypay | Iowa | 3 | 5.46 | 11 | II |
| 310 | Polypay | Iowa | 1 | 1.94 | 11 | II |
| 311 | Polypay | Iowa | 4 | .    | 11 | II |
| 312 | Polypay | Iowa | 3 | 19.5 | 11 | II |
| 313 | Polypay | Iowa | 3 | .    |    | DD |
| 314 | Polypay | Iowa | 3 | 2.4  | 11 | II |
| 315 | Polypay | Iowa | 4 | 7.2  | 11 | II |
| 316 | Polypay | Iowa | 3 | .    | 13 | ID |
| 317 | Polypay | Iowa | 5 | 32.2 | 11 | II |
| 318 | Polypay | Iowa | 3 |      | 13 | ID |
| 319 | Polypay | Iowa | 6 | 2.9  | 11 | ID |
| 320 | Polypay | Iowa | 4 | 637  | 13 | ID |
| 321 | Polypay | Iowa |   | .    | 11 | ID |
| 322 | Polypay | Iowa | 5 | 441  | 11 | ID |
| 323 | Polypay | Iowa | 4 | 182  | 12 | DD |
| 324 | Polypay | Iowa | 3 | .    |    | ID |
| 325 | Polypay | Iowa | 1 | .    | 11 | ID |
| 326 | Polypay | Iowa |   | 89   | 11 | II |
| 327 | Polypay | Iowa | 5 | 331  | 11 | ID |
| 328 | Polypay | Iowa | 5 | 417  | 11 | ID |
| 329 | Polypay | Iowa | 3 | .    | 11 | II |
| 330 | Polypay | Iowa | 4 | 313  | 23 | II |
| 331 | Polypay | Iowa | 3 | 4.5  | 11 | II |
| 332 | Polypay | Iowa | 4 | 575  | 12 | ID |
| 333 | Polypay | Iowa | 4 | 126  | 11 | II |
| 334 | Polypay | Iowa | 3 | .    | 11 | ID |
| 335 | Polypay | Iowa | 2 | 758  | 13 | ID |
| 336 | Polypay | Iowa | 2 | 11.7 | 11 | ID |
| 337 | Polypay | Iowa | 3 | .    | 11 | II |
| 338 | Polypay | Iowa | 3 | .    |    | ID |



|            |                      |         |   |            |    |    |
|------------|----------------------|---------|---|------------|----|----|
| <b>339</b> | Polypay              | Iowa    | 8 | 1.4        | 11 | II |
| <b>340</b> | Polypay              | Iowa    | 2 | 84.2       | 13 | ID |
| <b>341</b> | Columbia-Rambouillet | Montana | 6 | 16600<br>0 | 11 | II |
| <b>342</b> | Columbia-Rambouillet | Montana | 5 | 16300<br>0 | 11 | ID |
| <b>343</b> | Columbia-Rambouillet | Montana | 2 | 12000<br>0 | 11 | DD |
| <b>344</b> | Columbia-Rambouillet | Montana | 6 | 90700      | 11 | DD |
| <b>345</b> | Columbia-Rambouillet | Montana | 4 | 87300      | 11 | ID |
| <b>346</b> | Columbia-Rambouillet | Montana | 3 | 84800      | 11 | DD |
| <b>347</b> | Columbia-Rambouillet | Montana | 6 | 75900      | 11 | DD |
| <b>348</b> | Columbia-Rambouillet | Montana | 3 | 69300      | 11 | II |
| <b>349</b> | Columbia-Rambouillet | Montana | 3 | 68600      | 11 | II |
| <b>350</b> | Columbia-Rambouillet | Montana | 3 | 66700      | 11 | ID |
| <b>351</b> | Columbia-Rambouillet | Montana | 2 | 66100      | 11 | ID |
| <b>352</b> | Columbia-Rambouillet | Montana | 6 | 56500      | 11 | ID |
| <b>353</b> | Columbia-Rambouillet | Montana | 3 | 50700      | 11 | DD |
| <b>354</b> | Columbia-Rambouillet | Montana | 3 | 46500      | 11 | II |
| <b>355</b> | Columbia-Rambouillet | Montana | 4 | 43500      | 11 | DD |
| <b>356</b> | Columbia-Rambouillet | Montana | 3 | 42100      | 11 | ID |
| <b>357</b> | Columbia-Rambouillet | Montana | 4 | 39600      | 11 | ID |
| <b>358</b> | Columbia-Rambouillet | Montana | 3 | 39200      | 11 | ID |
| <b>359</b> | Columbia-Rambouillet | Montana | 8 | 39000      | 11 | ID |
| <b>360</b> | Columbia-Rambouillet | Montana | 5 | 38200      | 11 | DD |
| <b>361</b> | Columbia-Rambouillet | Montana | 6 | 37800      | 11 | ID |
| <b>362</b> | Columbia-Rambouillet | Montana | 4 | 36900      | 11 | ID |
| <b>363</b> | Columbia-Rambouillet | Montana | 4 | 35300      | 11 | ID |
| <b>364</b> | Columbia-Rambouillet | Montana | 5 | 35000      | 11 | DD |
| <b>365</b> | Columbia-Rambouillet | Montana | 2 | 34700      | 11 | ID |
| <b>366</b> | Columbia-Rambouillet | Montana | 5 | 32500      | 11 | ID |
| <b>367</b> | Columbia-Rambouillet | Montana | 2 | 32400      | 11 | ID |
| <b>368</b> | Columbia-Rambouillet | Montana | 6 | 31200      | 11 | II |
| <b>369</b> | Columbia-Rambouillet | Montana | 3 | 30700      | 11 | ID |
| <b>370</b> | Columbia-Rambouillet | Montana | 2 | 30300      | 11 | II |
| <b>371</b> | Columbia-Rambouillet | Montana | 3 | 29400      | 11 | DD |
| <b>372</b> | Columbia-Rambouillet | Montana | 6 | 28000      | 11 | DD |
| <b>373</b> | Columbia-Rambouillet | Montana | 6 | 26900      | 11 | DD |
| <b>374</b> | Columbia-Rambouillet | Montana | 3 | 23400      | 11 | ID |
| <b>375</b> | Columbia-Rambouillet | Montana | 5 | 23300      | 11 | ID |
| <b>376</b> | Columbia-Rambouillet | Montana | 7 | 22500      | 11 | II |
| <b>377</b> | Columbia-Rambouillet | Montana | 3 | 22200      | 11 | II |
| <b>378</b> | Columbia-Rambouillet | Montana | 2 | 21800      | 11 | ID |

|            |                      |         |   |       |    |    |
|------------|----------------------|---------|---|-------|----|----|
| <b>379</b> | Columbia-Rambouillet | Montana | 2 | 19700 | 11 | II |
| <b>380</b> | Columbia-Rambouillet | Montana | 3 | 19700 | 11 | II |
| <b>381</b> | Columbia-Rambouillet | Montana | . | 18400 | 11 | ID |
| <b>382</b> | Columbia-Rambouillet | Montana | 3 | 18100 | 11 | ID |
| <b>383</b> | Columbia-Rambouillet | Montana | 3 | 17200 | 11 | II |
| <b>384</b> | Columbia-Rambouillet | Montana | 2 | 17000 | 11 | II |
| <b>385</b> | Columbia-Rambouillet | Montana | 2 | 16600 | 11 | ID |
| <b>386</b> | Columbia-Rambouillet | Montana | 3 | 15400 | 11 | ID |
| <b>387</b> | Columbia-Rambouillet | Montana | 4 | 14700 | 11 | ID |
| <b>388</b> | Columbia-Rambouillet | Montana | 7 | 14500 | 11 | II |
| <b>389</b> | Columbia-Rambouillet | Montana | 3 | 14500 | 11 | DD |
| <b>390</b> | Columbia-Rambouillet | Montana | 5 | 14300 | 11 | ID |
| <b>391</b> | Columbia-Rambouillet | Montana | 1 | 14200 | 11 | II |
| <b>392</b> | Columbia-Rambouillet | Montana | 6 | 13700 | 11 | II |
| <b>393</b> | Columbia-Rambouillet | Montana | 3 | 13600 | 11 | ID |
| <b>394</b> | Columbia-Rambouillet | Montana | 3 | 13500 | 11 | ID |
| <b>395</b> | Columbia-Rambouillet | Montana | 8 | 13500 | 11 | II |
| <b>396</b> | Columbia-Rambouillet | Montana | 5 | 13300 | 11 | II |
| <b>397</b> | Columbia-Rambouillet | Montana | 6 | 13000 | 11 | ID |
| <b>398</b> | Columbia-Rambouillet | Montana | 3 | 12900 | 11 | ID |
| <b>399</b> | Columbia-Rambouillet | Montana | 4 | 12700 | 11 | DD |
| <b>400</b> | Columbia-Rambouillet | Montana | 2 | 12300 | 11 | ID |
| <b>401</b> | Columbia-Rambouillet | Montana | 4 | 12000 | 11 | DD |
| <b>402</b> | Columbia-Rambouillet | Montana | 6 | 11900 | 11 | ID |
| <b>403</b> | Columbia-Rambouillet | Montana | 3 | 11700 | 11 | ID |
| <b>404</b> | Columbia-Rambouillet | Montana | 1 | 11700 | 11 | ID |
| <b>405</b> | Columbia-Rambouillet | Montana | 5 | 11400 | 11 | ID |
| <b>406</b> | Columbia-Rambouillet | Montana | 1 | 11300 | 11 | II |
| <b>407</b> | Columbia-Rambouillet | Montana | . | 11200 | 11 | .  |
| <b>408</b> | Columbia-Rambouillet | Montana | 5 | 11100 | 11 | DD |
| <b>409</b> | Columbia-Rambouillet | Montana | 4 | 10600 | 11 | II |
| <b>410</b> | Columbia-Rambouillet | Montana | 2 | 10600 | 11 | ID |
| <b>411</b> | Columbia-Rambouillet | Montana | 5 | 10400 | 11 | II |
| <b>412</b> | Columbia-Rambouillet | Montana | 7 | 10300 | 11 | ID |
| <b>413</b> | Columbia-Rambouillet | Montana | 6 | 9910  | 11 | II |
| <b>414</b> | Columbia-Rambouillet | Montana | 5 | 9620  | 11 | ID |
| <b>415</b> | Columbia-Rambouillet | Montana | 7 | 9100  | 11 | DD |
| <b>416</b> | Columbia-Rambouillet | Montana | 2 | 9100  | 11 | ID |
| <b>417</b> | Columbia-Rambouillet | Montana | 4 | 9040  | 11 | DD |
| <b>418</b> | Columbia-Rambouillet | Montana | 2 | 8520  | 11 | ID |
| <b>419</b> | Columbia-Rambouillet | Montana | 4 | 8520  | 11 | DD |
| <b>420</b> | Columbia-Rambouillet | Montana | 1 | 8080  | 11 | ID |
| <b>421</b> | Columbia-Rambouillet | Montana | 6 | 8020  | 11 | DD |

|     |                      |         |   |      |    |    |
|-----|----------------------|---------|---|------|----|----|
| 422 | Columbia-Rambouillet | Montana | 5 | 7920 | 11 | II |
| 423 | Columbia-Rambouillet | Montana | 4 | 7910 | 11 | II |
| 424 | Columbia-Rambouillet | Montana | 4 | 7910 | 11 | ID |
| 425 | Columbia-Rambouillet | Montana | . | 7880 | 11 | II |
| 426 | Columbia-Rambouillet | Montana | 6 | 7650 | 11 | ID |
| 427 | Columbia-Rambouillet | Montana | 1 | 7600 | 11 | ID |
| 428 | Columbia-Rambouillet | Montana | 3 | 7250 | 11 | DD |
| 429 | Columbia-Rambouillet | Montana | 3 | 7200 | 11 | ID |
| 430 | Columbia-Rambouillet | Montana | . | 7130 | 11 | II |
| 431 | Columbia-Rambouillet | Montana | 1 | 7000 | 11 | II |
| 432 | Columbia-Rambouillet | Montana | . | 7000 | 11 | ID |
| 433 | Columbia-Rambouillet | Montana | 6 | 6840 | 11 | II |
| 434 | Columbia-Rambouillet | Montana | 1 | 6800 | 11 | II |
| 435 | Columbia-Rambouillet | Montana | 1 | 6500 | 11 | ID |
| 436 | Columbia-Rambouillet | Montana | 7 | 6470 | 11 | ID |
| 437 | Columbia-Rambouillet | Montana | 5 | 6400 | 11 | DD |
| 438 | Columbia-Rambouillet | Montana | 2 | 6380 | 11 | ID |
| 439 | Columbia-Rambouillet | Montana | 1 | 6280 | 11 | ID |
| 440 | Columbia-Rambouillet | Montana | 2 | 5900 | 11 | II |
| 441 | Columbia-Rambouillet | Montana | 1 | 5710 | 11 | II |
| 442 | Columbia-Rambouillet | Montana | 3 | 5660 | 11 | II |
| 443 | Columbia-Rambouillet | Montana | 2 | 5590 | 11 | DD |
| 444 | Columbia-Rambouillet | Montana | 4 | 5560 | 11 | ID |
| 445 | Columbia-Rambouillet | Montana | 3 | 5550 | 11 | DD |
| 446 | Columbia-Rambouillet | Montana | 3 | 5490 | 11 | II |
| 447 | Columbia-Rambouillet | Montana | 8 | 5460 | 11 | DD |
| 448 | Columbia-Rambouillet | Montana | . | 5340 | 11 | DD |
| 449 | Columbia-Rambouillet | Montana | . | 5340 | 11 | DD |
| 450 | Columbia-Rambouillet | Montana | 8 | 5340 | 11 | ID |
| 451 | Columbia-Rambouillet | Montana | 3 | 5270 | 11 | DD |
| 452 | Columbia-Rambouillet | Montana | 6 | 5260 | 11 | DD |
| 453 | Columbia-Rambouillet | Montana | 3 | 5230 | 11 | DD |
| 454 | Columbia-Rambouillet | Montana | 1 | 5170 | 11 | ID |
| 455 | Columbia-Rambouillet | Montana | 4 | 4950 | 11 | II |
| 456 | Columbia-Rambouillet | Montana | 2 | 4930 | 11 | II |
| 457 | Columbia-Rambouillet | Montana | 3 | 4910 | 11 | II |
| 458 | Columbia-Rambouillet | Montana | 4 | 4890 | 11 | ID |
| 459 | Columbia-Rambouillet | Montana | 6 | 4880 | 11 | DD |
| 460 | Columbia-Rambouillet | Montana | 2 | 4880 | 11 | ID |
| 461 | Columbia-Rambouillet | Montana | 2 | 4800 | 11 | ID |
| 462 | Columbia-Rambouillet | Montana | 3 | 4770 | 11 | ID |
| 463 | Columbia-Rambouillet | Montana | 6 | 4630 | 11 | ID |
| 464 | Columbia-Rambouillet | Montana | . | 4580 | 11 | ID |

|     |                      |         |   |      |    |    |
|-----|----------------------|---------|---|------|----|----|
| 465 | Columbia-Rambouillet | Montana | 4 | 4480 | 11 | ID |
| 466 | Columbia-Rambouillet | Montana | 2 | 4450 | 11 | ID |
| 467 | Columbia-Rambouillet | Montana | 1 | 4380 | 11 | DD |
| 468 | Columbia-Rambouillet | Montana | 2 | 4290 | 11 | ID |
| 469 | Columbia-Rambouillet | Montana | 2 | 4290 | 11 | II |
| 470 | Columbia-Rambouillet | Montana | 2 | 4240 | 11 | DD |
| 471 | Columbia-Rambouillet | Montana | . | 4220 | 11 | ID |
| 472 | Columbia-Rambouillet | Montana | 4 | 4200 | 11 | ID |
| 473 | Columbia-Rambouillet | Montana | 3 | 4200 | 11 | ID |
| 474 | Columbia-Rambouillet | Montana | 4 | 4170 | 11 | DD |
| 475 | Columbia-Rambouillet | Montana | 5 | 4160 | 11 | ID |
| 476 | Columbia-Rambouillet | Montana | 2 | 4120 | 11 | DD |
| 477 | Columbia-Rambouillet | Montana | 2 | 4120 | 11 | ID |
| 478 | Columbia-Rambouillet | Montana | 3 | 3990 | 11 | ID |
| 479 | Columbia-Rambouillet | Montana | 3 | 3970 | 11 | DD |
| 480 | Columbia-Rambouillet | Montana | 2 | 3940 | 11 | ID |
| 481 | Columbia-Rambouillet | Montana | 4 | 3910 | 11 | ID |
| 482 | Columbia-Rambouillet | Montana | 4 | 3880 | 11 | II |
| 483 | Columbia-Rambouillet | Montana | 3 | 3830 | 11 | ID |
| 484 | Columbia-Rambouillet | Montana | 3 | 3790 | 11 | II |
| 485 | Columbia-Rambouillet | Montana | 1 | 3790 | 11 | ID |
| 486 | Columbia-Rambouillet | Montana | 2 | 3780 | 11 | ID |
| 487 | Columbia-Rambouillet | Montana | 2 | 3780 | 11 | ID |
| 488 | Columbia-Rambouillet | Montana | 8 | 3760 | 11 | ID |
| 489 | Columbia-Rambouillet | Montana | 3 | 3760 | 11 | II |
| 490 | Columbia-Rambouillet | Montana | 4 | 3670 | 11 | DD |
| 491 | Columbia-Rambouillet | Montana | 5 | 3590 | 11 | II |
| 492 | Columbia-Rambouillet | Montana | 6 | 3570 | 11 | ID |
| 493 | Columbia-Rambouillet | Montana | 4 | 3550 | 11 | II |
| 494 | Columbia-Rambouillet | Montana | 3 | 3500 | 11 | II |
| 495 | Columbia-Rambouillet | Montana | 3 | 3450 | 11 | ID |
| 496 | Columbia-Rambouillet | Montana | . | 3410 | 11 | ID |
| 497 | Columbia-Rambouillet | Montana | 4 | 3310 | 11 | II |
| 498 | Columbia-Rambouillet | Montana | 3 | 3270 | 11 | ID |
| 499 | Columbia-Rambouillet | Montana | 4 | 3240 | 11 | ID |
| 500 | Columbia-Rambouillet | Montana | 3 | 3190 | 11 | ID |
| 501 | Columbia-Rambouillet | Montana | 3 | 3170 | 11 | ID |
| 502 | Columbia-Rambouillet | Montana | 4 | 3170 | 11 | II |
| 503 | Columbia-Rambouillet | Montana | 1 | 3150 | 11 | DD |
| 504 | Columbia-Rambouillet | Montana | 2 | 3130 | 11 | DD |
| 505 | Columbia-Rambouillet | Montana | 3 | 3090 | 11 | DD |
| 506 | Columbia-Rambouillet | Montana | 1 | 3070 | 11 | ID |
| 507 | Columbia-Rambouillet | Montana | . | 3060 | 11 | II |

|     |                      |         |   |      |    |    |
|-----|----------------------|---------|---|------|----|----|
| 508 | Columbia-Rambouillet | Montana | 3 | 3000 | 11 | ID |
| 509 | Columbia-Rambouillet | Montana | 3 | 3000 | 11 | ID |
| 510 | Columbia-Rambouillet | Montana | . | 2890 | 11 | DD |
| 511 | Columbia-Rambouillet | Montana | 6 | 2870 | 11 | II |
| 512 | Columbia-Rambouillet | Montana | . | 2870 | 11 | ID |
| 513 | Columbia-Rambouillet | Montana | 2 | 2850 | 11 | ID |
| 514 | Columbia-Rambouillet | Montana | 3 | 2820 | 11 | ID |
| 515 | Columbia-Rambouillet | Montana | 6 | 2820 | 11 | DD |
| 516 | Columbia-Rambouillet | Montana | 1 | 2800 | 11 | ID |
| 517 | Columbia-Rambouillet | Montana | 2 | 2790 | 11 | DD |
| 518 | Columbia-Rambouillet | Montana | . | 2750 | 11 | ID |
| 519 | Columbia-Rambouillet | Montana | 5 | 2720 | 11 | II |
| 520 | Columbia-Rambouillet | Montana | 6 | 2720 | 11 | DD |
| 521 | Columbia-Rambouillet | Montana | 7 | 2700 | 11 | II |
| 522 | Columbia-Rambouillet | Montana | 3 | 2670 | 11 | DD |
| 523 | Columbia-Rambouillet | Montana | 3 | 2660 | 11 | ID |
| 524 | Columbia-Rambouillet | Montana | 4 | 2650 | 11 | II |
| 525 | Columbia-Rambouillet | Montana | 3 | 2620 | 11 | DD |
| 526 | Columbia-Rambouillet | Montana | 5 | 2610 | 11 | II |
| 527 | Columbia-Rambouillet | Montana | 2 | 2540 | 11 | II |
| 528 | Columbia-Rambouillet | Montana | 3 | 2530 | 11 | ID |
| 529 | Columbia-Rambouillet | Montana | 4 | 2490 | 11 | II |
| 530 | Columbia-Rambouillet | Montana | 7 | 2470 | 11 | II |
| 531 | Columbia-Rambouillet | Montana | 5 | 2440 | 11 | II |
| 532 | Columbia-Rambouillet | Montana | 2 | 2420 | 11 | ID |
| 533 | Columbia-Rambouillet | Montana | 4 | 2420 | 11 | DD |
| 534 | Columbia-Rambouillet | Montana | 4 | 2410 | 11 | DD |
| 535 | Columbia-Rambouillet | Montana | 3 | 2410 | 11 | ID |
| 536 | Columbia-Rambouillet | Montana | . | 2410 | 11 | ID |
| 537 | Columbia-Rambouillet | Montana | 3 | 2410 | 11 | II |
| 538 | Columbia-Rambouillet | Montana | 6 | 2390 | 11 | ID |
| 539 | Columbia-Rambouillet | Montana | 6 | 2380 | 11 | ID |
| 540 | Columbia-Rambouillet | Montana | 1 | 2210 | 11 | II |
| 541 | Columbia-Rambouillet | Montana | 3 | 2180 | 11 | II |
| 542 | Columbia-Rambouillet | Montana | 7 | 2180 | 11 | II |
| 543 | Columbia-Rambouillet | Montana | 1 | 2170 | 11 | ID |
| 544 | Columbia-Rambouillet | Montana | 1 | 2160 | 11 | II |
| 545 | Columbia-Rambouillet | Montana | 3 | 2160 | 11 | ID |
| 546 | Columbia-Rambouillet | Montana | 2 | 2150 | 11 | ID |
| 547 | Columbia-Rambouillet | Montana | 8 | 2120 | 11 | ID |
| 548 | Columbia-Rambouillet | Montana | 3 | 2100 | 11 | II |
| 549 | Columbia-Rambouillet | Montana | 6 | 2080 | 11 | II |
| 550 | Columbia-Rambouillet | Montana | 4 | 2050 | 11 | II |

|     |                      |         |   |      |    |    |
|-----|----------------------|---------|---|------|----|----|
| 551 | Columbia-Rambouillet | Montana | 6 | 2050 | 11 | ID |
| 552 | Columbia-Rambouillet | Montana | 4 | 2030 | 11 | II |
| 553 | Columbia-Rambouillet | Montana | 1 | 2030 | 11 | ID |
| 554 | Columbia-Rambouillet | Montana | 7 | 2010 | 11 | ID |
| 555 | Columbia-Rambouillet | Montana | 4 | 1980 | 11 | DD |
| 556 | Columbia-Rambouillet | Montana | 1 | 1960 | 11 | ID |
| 557 | Columbia-Rambouillet | Montana | 1 | 1960 | 11 | DD |
| 558 | Columbia-Rambouillet | Montana | 7 | 1950 | 11 | II |
| 559 | Columbia-Rambouillet | Montana | 3 | 1930 | 11 | II |
| 560 | Columbia-Rambouillet | Montana | 2 | 1920 | 11 | ID |
| 561 | Columbia-Rambouillet | Montana | 2 | 1920 | 11 | DD |
| 562 | Columbia-Rambouillet | Montana | 4 | 1920 | 11 | II |
| 563 | Columbia-Rambouillet | Montana | 2 | 1910 | 11 | DD |
| 564 | Columbia-Rambouillet | Montana | 3 | 1900 | 11 | II |
| 565 | Columbia-Rambouillet | Montana | . | 1890 | 11 | DD |
| 566 | Columbia-Rambouillet | Montana | . | 1870 | 11 | ID |
| 567 | Columbia-Rambouillet | Montana | 3 | 1860 | 11 | ID |
| 568 | Columbia-Rambouillet | Montana | 2 | 1860 | 11 | ID |
| 569 | Columbia-Rambouillet | Montana | 4 | 1840 | 11 | ID |
| 570 | Columbia-Rambouillet | Montana | 2 | 1840 | 11 | DD |
| 571 | Columbia-Rambouillet | Montana | 2 | 1810 | 11 | ID |
| 572 | Columbia-Rambouillet | Montana | 7 | 1800 | 11 | ID |
| 573 | Columbia-Rambouillet | Montana | . | 1800 | 11 | ID |
| 574 | Columbia-Rambouillet | Montana | 3 | 1790 | 11 | DD |
| 575 | Columbia-Rambouillet | Montana | . | 1770 | 11 | II |
| 576 | Columbia-Rambouillet | Montana | 2 | 1760 | 11 | II |
| 577 | Columbia-Rambouillet | Montana | 6 | 1760 | 11 | ID |
| 578 | Columbia-Rambouillet | Montana | 6 | 1760 | 11 | DD |
| 579 | Columbia-Rambouillet | Montana | 2 | 1740 | 11 | ID |
| 580 | Columbia-Rambouillet | Montana | 1 | 1740 | 11 | DD |
| 581 | Columbia-Rambouillet | Montana | . | 1730 | 11 | .  |
| 582 | Columbia-Rambouillet | Montana | 4 | 1720 | 11 | ID |
| 583 | Columbia-Rambouillet | Montana | 3 | 1650 | 11 | ID |
| 584 | Columbia-Rambouillet | Montana | 3 | 1630 | 11 | II |
| 585 | Columbia-Rambouillet | Montana | 2 | 1620 | 11 | ID |
| 586 | Columbia-Rambouillet | Montana | 3 | 1600 | 11 | ID |
| 587 | Columbia-Rambouillet | Montana | 3 | 1580 | 11 | II |
| 588 | Columbia-Rambouillet | Montana | 2 | 1540 | 11 | ID |
| 589 | Columbia-Rambouillet | Montana | 7 | 1530 | 11 | ID |
| 590 | Columbia-Rambouillet | Montana | 3 | 1530 | 11 | ID |
| 591 | Columbia-Rambouillet | Montana | 4 | 1500 | 11 | II |
| 592 | Columbia-Rambouillet | Montana | 2 | 1490 | 11 | ID |
| 593 | Columbia-Rambouillet | Montana | 8 | 1490 | 11 | II |

---

|     |                      |         |   |      |    |    |
|-----|----------------------|---------|---|------|----|----|
| 594 | Columbia-Rambouillet | Montana | 1 | 1460 | 11 | II |
| 595 | Columbia-Rambouillet | Montana | 6 | 1450 | 11 | II |
| 596 | Columbia-Rambouillet | Montana | 2 | 1440 | 11 | ID |
| 597 | Columbia-Rambouillet | Montana | . | 1440 | 11 | DD |
| 598 | Columbia-Rambouillet | Montana | 1 | 1420 | 11 | II |
| 599 | Columbia-Rambouillet | Montana | 4 | 1400 | 11 | ID |
| 600 | Columbia-Rambouillet | Montana | 1 | 1390 | 11 | II |
| 601 | Columbia-Rambouillet | Montana | . | 1380 | 11 | II |
| 602 | Columbia-Rambouillet | Montana | 3 | 1380 | 11 | II |
| 603 | Columbia-Rambouillet | Montana | 8 | 1370 | 11 | ID |
| 604 | Columbia-Rambouillet | Montana | 3 | 1370 | 11 | ID |
| 605 | Columbia-Rambouillet | Montana | . | 1350 | 11 | ID |
| 606 | Columbia-Rambouillet | Montana | 4 | 1340 | 11 | II |
| 607 | Columbia-Rambouillet | Montana | 4 | 1340 | 11 | DD |
| 608 | Columbia-Rambouillet | Montana | 5 | 1330 | 11 | DD |
| 609 | Columbia-Rambouillet | Montana | 1 | 1310 | 11 | DD |
| 610 | Columbia-Rambouillet | Montana | 2 | 1290 | 11 | DD |
| 611 | Columbia-Rambouillet | Montana | 3 | 1260 | 11 | DD |
| 612 | Columbia-Rambouillet | Montana | 4 | 1240 | 11 | ID |
| 613 | Columbia-Rambouillet | Montana | 1 | 1240 | 11 | II |
| 614 | Columbia-Rambouillet | Montana | 1 | 1220 | 11 | ID |
| 615 | Columbia-Rambouillet | Montana | 2 | 1220 | 11 | II |
| 616 | Columbia-Rambouillet | Montana | 1 | 1210 | 11 | ID |
| 617 | Columbia-Rambouillet | Montana | 1 | 1190 | 11 | DD |
| 618 | Columbia-Rambouillet | Montana | 2 | 1190 | 11 | DD |
| 619 | Columbia-Rambouillet | Montana | 2 | 1180 | 11 | ID |
| 620 | Columbia-Rambouillet | Montana | 7 | 1180 | 11 | DD |
| 621 | Columbia-Rambouillet | Montana | 1 | 1170 | 11 | II |
| 622 | Columbia-Rambouillet | Montana | 3 | 1160 | 11 | ID |
| 623 | Columbia-Rambouillet | Montana | 1 | 1140 | 11 | ID |
| 624 | Columbia-Rambouillet | Montana | 4 | 1140 | 11 | DD |
| 625 | Columbia-Rambouillet | Montana | . | 1130 | 11 | ID |
| 626 | Columbia-Rambouillet | Montana | 4 | 1130 | 11 | II |
| 627 | Columbia-Rambouillet | Montana | 4 | 1120 | 11 | II |
| 628 | Columbia-Rambouillet | Montana | 3 | 1120 | 11 | ID |
| 629 | Columbia-Rambouillet | Montana | 2 | 1090 | 11 | ID |
| 630 | Columbia-Rambouillet | Montana | 1 | 1090 | 11 | ID |
| 631 | Columbia-Rambouillet | Montana | 2 | 1090 | 11 | DD |
| 632 | Columbia-Rambouillet | Montana | 7 | 1080 | 11 | II |
| 633 | Columbia-Rambouillet | Montana | 2 | 1070 | 11 | DD |
| 634 | Columbia-Rambouillet | Montana | 2 | 1060 | 11 | ID |
| 635 | Columbia-Rambouillet | Montana | 8 | 1050 | 11 | ID |
| 636 | Columbia-Rambouillet | Montana | . | 1050 | 11 | II |

---

|     |                      |         |   |      |    |    |
|-----|----------------------|---------|---|------|----|----|
| 637 | Columbia-Rambouillet | Montana | 1 | 1040 | 11 | II |
| 638 | Columbia-Rambouillet | Montana | 1 | 1040 | 11 | II |
| 639 | Columbia-Rambouillet | Montana | 3 | 1030 | 11 | II |
| 640 | Columbia-Rambouillet | Montana | 3 | 1020 | 11 | II |
| 641 | Columbia-Rambouillet | Montana | 1 | 1010 | 11 | ID |
| 642 | Columbia-Rambouillet | Montana | 3 | 976  | 11 | ID |
| 643 | Columbia-Rambouillet | Montana | 8 | 965  | 11 | II |
| 644 | Columbia-Rambouillet | Montana | 1 | 957  | 11 | ID |
| 645 | Columbia-Rambouillet | Montana | . | 947  | 11 | ID |
| 646 | Columbia-Rambouillet | Montana | 1 | 939  | 11 | ID |
| 647 | Columbia-Rambouillet | Montana | 7 | 937  | 11 | DD |
| 648 | Columbia-Rambouillet | Montana | . | 930  | 11 | II |
| 649 | Columbia-Rambouillet | Montana | 2 | 930  | 11 | ID |
| 650 | Columbia-Rambouillet | Montana | . | 888  | 11 | II |
| 651 | Columbia-Rambouillet | Montana | 2 | 875  | 11 | ID |
| 652 | Columbia-Rambouillet | Montana | 4 | 874  | 11 | II |
| 653 | Columbia-Rambouillet | Montana | 2 | 863  | 11 | II |
| 654 | Columbia-Rambouillet | Montana | . | 859  | 11 | DD |
| 655 | Columbia-Rambouillet | Montana | 1 | 855  | 11 | ID |
| 656 | Columbia-Rambouillet | Montana | 3 | 850  | 11 | ID |
| 657 | Columbia-Rambouillet | Montana | 2 | 843  | 11 | II |
| 658 | Columbia-Rambouillet | Montana | 1 | 810  | 11 | II |
| 659 | Columbia-Rambouillet | Montana | . | 808  | 11 | DD |
| 660 | Columbia-Rambouillet | Montana | 2 | 801  | 11 | ID |
| 661 | Columbia-Rambouillet | Montana | 3 | 800  | 11 | II |
| 662 | Columbia-Rambouillet | Montana | 6 | 787  | 11 | ID |
| 663 | Columbia-Rambouillet | Montana | 3 | 777  | 11 | ID |
| 664 | Columbia-Rambouillet | Montana | 2 | 773  | 11 | II |
| 665 | Columbia-Rambouillet | Montana | . | 761  | 11 | ID |
| 666 | Columbia-Rambouillet | Montana | 6 | 760  | 11 | ID |
| 667 | Columbia-Rambouillet | Montana | 3 | 756  | 11 | II |
| 668 | Columbia-Rambouillet | Montana | 2 | 756  | 11 | ID |
| 669 | Columbia-Rambouillet | Montana | 6 | 749  | 11 | II |
| 670 | Columbia-Rambouillet | Montana | 4 | 749  | 11 | II |
| 671 | Columbia-Rambouillet | Montana | 4 | 739  | 11 | ID |
| 672 | Columbia-Rambouillet | Montana | 4 | 739  | 11 | ID |
| 673 | Columbia-Rambouillet | Montana | 2 | 732  | 11 | ID |
| 674 | Columbia-Rambouillet | Montana | 2 | 704  | 11 | ID |
| 675 | Columbia-Rambouillet | Montana | 1 | 694  | 11 | ID |
| 676 | Columbia-Rambouillet | Montana | 3 | 694  | 11 | ID |
| 677 | Columbia-Rambouillet | Montana | 3 | 694  | 11 | II |
| 678 | Columbia-Rambouillet | Montana | 6 | 678  | 11 | DD |
| 679 | Columbia-Rambouillet | Montana | 1 | 674  | 11 | DD |



|     |                      |         |   |     |    |    |
|-----|----------------------|---------|---|-----|----|----|
| 680 | Columbia-Rambouillet | Montana | 6 | 671 | 11 | ID |
| 681 | Columbia-Rambouillet | Montana | 4 | 668 | 11 | II |
| 682 | Columbia-Rambouillet | Montana | 1 | 639 | 11 | ID |
| 683 | Columbia-Rambouillet | Montana | 4 | 629 | 11 | ID |
| 684 | Columbia-Rambouillet | Montana | 2 | 606 | 11 | ID |
| 685 | Columbia-Rambouillet | Montana | 3 | 606 | 11 | ID |
| 686 | Columbia-Rambouillet | Montana | 4 | 606 | 11 | ID |
| 687 | Columbia-Rambouillet | Montana | 2 | 595 | 11 | II |
| 688 | Columbia-Rambouillet | Montana | 1 | 593 | 11 | DD |
| 689 | Columbia-Rambouillet | Montana | 4 | 586 | 11 | DD |
| 690 | Columbia-Rambouillet | Montana | . | 583 | 11 | DD |
| 691 | Columbia-Rambouillet | Montana | . | 582 | 11 | ID |
| 692 | Columbia-Rambouillet | Montana | 3 | 580 | 11 | ID |
| 693 | Columbia-Rambouillet | Montana | 3 | 575 | 11 | ID |
| 694 | Columbia-Rambouillet | Montana | 2 | 565 | 11 | ID |
| 695 | Columbia-Rambouillet | Montana | 2 | 565 | 11 | DD |
| 696 | Columbia-Rambouillet | Montana | 1 | 564 | 11 | II |
| 697 | Columbia-Rambouillet | Montana | 1 | 555 | 11 | ID |
| 698 | Columbia-Rambouillet | Montana | 6 | 554 | 11 | II |
| 699 | Columbia-Rambouillet | Montana | 1 | 545 | 11 | DD |
| 700 | Columbia-Rambouillet | Montana | 4 | 536 | 11 | ID |
| 701 | Columbia-Rambouillet | Montana | 3 | 531 | 11 | ID |
| 702 | Columbia-Rambouillet | Montana | . | 531 | 11 | II |
| 703 | Columbia-Rambouillet | Montana | 1 | 529 | 11 | ID |
| 704 | Columbia-Rambouillet | Montana | 5 | 521 | 11 | ID |
| 705 | Columbia-Rambouillet | Montana | 2 | 520 | 11 | ID |
| 706 | Columbia-Rambouillet | Montana | . | 518 | 11 | II |
| 707 | Columbia-Rambouillet | Montana | 6 | 506 | 11 | II |
| 708 | Columbia-Rambouillet | Montana | 1 | 503 | 11 | ID |
| 709 | Columbia-Rambouillet | Montana | 2 | 493 | 11 | DD |
| 710 | Columbia-Rambouillet | Montana | 3 | 481 | 11 | II |
| 711 | Columbia-Rambouillet | Montana | 2 | 472 | 11 | ID |
| 712 | Columbia-Rambouillet | Montana | 2 | 468 | 11 | DD |
| 713 | Columbia-Rambouillet | Montana | 4 | 467 | 11 | II |
| 714 | Columbia-Rambouillet | Montana | 3 | 464 | 11 | ID |
| 715 | Columbia-Rambouillet | Montana | 1 | 461 | 11 | II |
| 716 | Columbia-Rambouillet | Montana | 6 | 459 | 11 | DD |
| 717 | Columbia-Rambouillet | Montana | 1 | 445 | 11 | ID |
| 718 | Columbia-Rambouillet | Montana | . | 445 | 11 | ID |
| 719 | Columbia-Rambouillet | Montana | 1 | 442 | 11 | II |
| 720 | Columbia-Rambouillet | Montana | . | 433 | 11 | ID |
| 721 | Columbia-Rambouillet | Montana | 2 | 430 | 11 | II |
| 722 | Columbia-Rambouillet | Montana | 1 | 420 | 11 | ID |

|     |                      |         |   |     |    |    |
|-----|----------------------|---------|---|-----|----|----|
| 723 | Columbia-Rambouillet | Montana | 3 | 406 | 11 | ID |
| 724 | Columbia-Rambouillet | Montana | 2 | 402 | 11 | ID |
| 725 | Columbia-Rambouillet | Montana | 8 | 397 | 11 | ID |
| 726 | Columbia-Rambouillet | Montana | 1 | 395 | 11 | DD |
| 727 | Columbia-Rambouillet | Montana | 2 | 395 | 11 | DD |
| 728 | Columbia-Rambouillet | Montana | . | 392 | 11 | ID |
| 729 | Columbia-Rambouillet | Montana | 3 | 392 | 11 | ID |
| 730 | Columbia-Rambouillet | Montana | 2 | 387 | 11 | ID |
| 731 | Columbia-Rambouillet | Montana | 3 | 381 | 11 | DD |
| 732 | Columbia-Rambouillet | Montana | 4 | 381 | 11 | DD |
| 733 | Columbia-Rambouillet | Montana | 1 | 365 | 11 | ID |
| 734 | Columbia-Rambouillet | Montana | 1 | 365 | 11 | ID |
| 735 | Columbia-Rambouillet | Montana | 3 | 364 | 11 | II |
| 736 | Columbia-Rambouillet | Montana | 2 | 363 | 11 | ID |
| 737 | Columbia-Rambouillet | Montana | 1 | 354 | 11 | ID |
| 738 | Columbia-Rambouillet | Montana | 1 | 351 | 11 | II |
| 739 | Columbia-Rambouillet | Montana | 3 | 347 | 11 | ID |
| 740 | Columbia-Rambouillet | Montana | 1 | 342 | 11 | ID |
| 741 | Columbia-Rambouillet | Montana | 1 | 339 | 11 | II |
| 742 | Columbia-Rambouillet | Montana | 6 | 334 | 11 | ID |
| 743 | Columbia-Rambouillet | Montana | 5 | 333 | 11 | II |
| 744 | Columbia-Rambouillet | Montana | 2 | 329 | 11 | DD |
| 745 | Columbia-Rambouillet | Montana | 3 | 329 | 11 | II |
| 746 | Columbia-Rambouillet | Montana | 3 | 326 | 11 | ID |
| 747 | Columbia-Rambouillet | Montana | 4 | 319 | 11 | ID |
| 748 | Columbia-Rambouillet | Montana | 5 | 318 | 11 | .  |
| 749 | Columbia-Rambouillet | Montana | . | 314 | 11 | DD |
| 750 | Columbia-Rambouillet | Montana | 2 | 310 | 11 | II |
| 751 | Columbia-Rambouillet | Montana | 2 | 305 | 11 | ID |
| 752 | Columbia-Rambouillet | Montana | 3 | 303 | 11 | II |
| 753 | Columbia-Rambouillet | Montana | 1 | 298 | 11 | ID |
| 754 | Columbia-Rambouillet | Montana | 1 | 297 | 11 | II |
| 755 | Columbia-Rambouillet | Montana | 1 | 296 | 11 | ID |
| 756 | Columbia-Rambouillet | Montana | 2 | 287 | 11 | ID |
| 757 | Columbia-Rambouillet | Montana | 4 | 280 | 11 | ID |
| 758 | Columbia-Rambouillet | Montana | 6 | 274 | 11 | DD |
| 759 | Columbia-Rambouillet | Montana | 1 | 273 | 11 | ID |
| 760 | Columbia-Rambouillet | Montana | 2 | 265 | 11 | DD |
| 761 | Columbia-Rambouillet | Montana | 4 | 265 | 11 | II |
| 762 | Columbia-Rambouillet | Montana | 2 | 263 | 11 | DD |
| 763 | Columbia-Rambouillet | Montana | 5 | 253 | 11 | ID |
| 764 | Columbia-Rambouillet | Montana | 3 | 248 | 11 | ID |
| 765 | Columbia-Rambouillet | Montana | 2 | 241 | 11 | ID |

|     |                      |         |   |     |    |    |
|-----|----------------------|---------|---|-----|----|----|
| 766 | Columbia-Rambouillet | Montana | 8 | 235 | 11 | II |
| 767 | Columbia-Rambouillet | Montana | 4 | 231 | 11 | ID |
| 768 | Columbia-Rambouillet | Montana | 1 | 221 | 11 | II |
| 769 | Columbia-Rambouillet | Montana | 2 | 217 | 11 | DD |
| 770 | Columbia-Rambouillet | Montana | 2 | 215 | 11 | II |
| 771 | Columbia-Rambouillet | Montana | 2 | 214 | 11 | ID |
| 772 | Columbia-Rambouillet | Montana | 2 | 210 | 11 | II |
| 773 | Columbia-Rambouillet | Montana | 1 | 206 | 11 | DD |
| 774 | Columbia-Rambouillet | Montana | 2 | 201 | 11 | DD |
| 775 | Columbia-Rambouillet | Montana | 2 | 198 | 11 | II |
| 776 | Columbia-Rambouillet | Montana | 4 | 196 | 11 | ID |
| 777 | Columbia-Rambouillet | Montana | 1 | 195 | 11 | II |
| 778 | Columbia-Rambouillet | Montana | 8 | 193 | 11 | ID |
| 779 | Columbia-Rambouillet | Montana | 2 | 191 | 11 | DD |
| 780 | Columbia-Rambouillet | Montana | 2 | 190 | 11 | ID |
| 781 | Columbia-Rambouillet | Montana | 1 | 188 | 11 | ID |
| 782 | Columbia-Rambouillet | Montana | 6 | 187 | 11 | DD |
| 783 | Columbia-Rambouillet | Montana | 2 | 182 | 11 | ID |
| 784 | Columbia-Rambouillet | Montana | 2 | 181 | 11 | DD |
| 785 | Columbia-Rambouillet | Montana | 5 | 175 | 11 | DD |
| 786 | Columbia-Rambouillet | Montana | 4 | 175 | 11 | ID |
| 787 | Columbia-Rambouillet | Montana | . | 175 | 11 | DD |
| 788 | Columbia-Rambouillet | Montana | 1 | 174 | 11 | DD |
| 789 | Columbia-Rambouillet | Montana | 2 | 173 | 11 | DD |
| 790 | Columbia-Rambouillet | Montana | 4 | 172 | 11 | DD |
| 791 | Columbia-Rambouillet | Montana | 8 | 171 | 11 | ID |
| 792 | Columbia-Rambouillet | Montana | 2 | 167 | 11 | II |
| 793 | Columbia-Rambouillet | Montana | 2 | 165 | 11 | ID |
| 794 | Columbia-Rambouillet | Montana | 4 | 165 | 11 | II |
| 795 | Columbia-Rambouillet | Montana | 1 | 164 | 11 | ID |
| 796 | Columbia-Rambouillet | Montana | 1 | 163 | 11 | II |
| 797 | Columbia-Rambouillet | Montana | 1 | 162 | 11 | II |
| 798 | Columbia-Rambouillet | Montana | 7 | 161 | 11 | ID |
| 799 | Columbia-Rambouillet | Montana | . | 155 | 11 | II |
| 800 | Columbia-Rambouillet | Montana | 2 | 152 | 11 | DD |
| 801 | Columbia-Rambouillet | Montana | 3 | 151 | 11 | II |
| 802 | Columbia-Rambouillet | Montana | . | 144 | 11 | ID |
| 803 | Columbia-Rambouillet | Montana | 1 | 143 | 11 | DD |
| 804 | Columbia-Rambouillet | Montana | 3 | 142 | 11 | DD |
| 805 | Columbia-Rambouillet | Montana | 1 | 142 | 11 | DD |
| 806 | Columbia-Rambouillet | Montana | 2 | 141 | 11 | II |
| 807 | Columbia-Rambouillet | Montana | 1 | 140 | 11 | ID |
| 808 | Columbia-Rambouillet | Montana | . | 139 | 11 | II |

|            |                      |         |   |      |    |    |
|------------|----------------------|---------|---|------|----|----|
| <b>809</b> | Columbia-Rambouillet | Montana | 3 | 139  | 11 | ID |
| <b>810</b> | Columbia-Rambouillet | Montana | 8 | 138  | 11 | DD |
| <b>811</b> | Columbia-Rambouillet | Montana | 2 | 138  | 11 | II |
| <b>812</b> | Columbia-Rambouillet | Montana | 1 | 136  | 11 | ID |
| <b>813</b> | Columbia-Rambouillet | Montana | 3 | 135  | 11 | ID |
| <b>814</b> | Columbia-Rambouillet | Montana | 2 | 133  | 11 | ID |
| <b>815</b> | Columbia-Rambouillet | Montana | 3 | 132  | 11 | II |
| <b>816</b> | Columbia-Rambouillet | Montana | . | 128  | 11 | II |
| <b>817</b> | Columbia-Rambouillet | Montana | . | 128  | 11 | DD |
| <b>818</b> | Columbia-Rambouillet | Montana | 1 | 125  | 11 | II |
| <b>819</b> | Columbia-Rambouillet | Montana | 3 | 124  | 11 | II |
| <b>820</b> | Columbia-Rambouillet | Montana | 1 | 118  | 11 | DD |
| <b>821</b> | Columbia-Rambouillet | Montana | 1 | 117  | 11 | ID |
| <b>822</b> | Columbia-Rambouillet | Montana | 1 | 117  | 11 | ID |
| <b>823</b> | Columbia-Rambouillet | Montana | 2 | 117  | 11 | II |
| <b>824</b> | Columbia-Rambouillet | Montana | 1 | 116  | 11 | ID |
| <b>825</b> | Columbia-Rambouillet | Montana | 7 | 113  | 11 | II |
| <b>826</b> | Columbia-Rambouillet | Montana | 2 | 112  | 11 | DD |
| <b>827</b> | Columbia-Rambouillet | Montana | 3 | 112  | 11 | ID |
| <b>828</b> | Columbia-Rambouillet | Montana | 4 | 108  | 11 | II |
| <b>829</b> | Columbia-Rambouillet | Montana | 2 | 107  | 11 | ID |
| <b>830</b> | Columbia-Rambouillet | Montana | 4 | 99.8 | 11 | II |
| <b>831</b> | Columbia-Rambouillet | Montana | 4 | 98.3 | 11 | DD |
| <b>832</b> | Columbia-Rambouillet | Montana | 7 | 97.8 | 11 | II |
| <b>833</b> | Columbia-Rambouillet | Montana | 3 | 93.5 | 11 | ID |
| <b>834</b> | Columbia-Rambouillet | Montana | 3 | 93.4 | 11 | II |
| <b>835</b> | Columbia-Rambouillet | Montana | 1 | 91.6 | 11 | ID |
| <b>836</b> | Columbia-Rambouillet | Montana | 1 | 91.4 | 11 | ID |
| <b>837</b> | Columbia-Rambouillet | Montana | 2 | 84.6 | 11 | DD |
| <b>838</b> | Columbia-Rambouillet | Montana | 1 | 84.1 | 11 | II |
| <b>839</b> | Columbia-Rambouillet | Montana | 3 | 81.5 | 11 | II |
| <b>840</b> | Columbia-Rambouillet | Montana | 2 | 80.9 | 11 | II |
| <b>841</b> | Columbia-Rambouillet | Montana | 4 | 80.9 | 11 | II |
| <b>842</b> | Columbia-Rambouillet | Montana | 1 | 79.8 | 11 | II |
| <b>843</b> | Columbia-Rambouillet | Montana | 1 | 78.4 | 11 | ID |
| <b>844</b> | Columbia-Rambouillet | Montana | 3 | 77.3 | 11 | ID |
| <b>845</b> | Columbia-Rambouillet | Montana | 1 | 71.5 | 11 | DD |
| <b>846</b> | Columbia-Rambouillet | Montana | . | 70.7 | 11 | ID |
| <b>847</b> | Columbia-Rambouillet | Montana | 3 | 70.1 | 11 | II |
| <b>848</b> | Columbia-Rambouillet | Montana | 2 | 68.5 | 11 | ID |
| <b>849</b> | Columbia-Rambouillet | Montana | 1 | 68.2 | 11 | ID |
| <b>850</b> | Columbia-Rambouillet | Montana | 1 | 68   | 11 | DD |
| <b>851</b> | Columbia-Rambouillet | Montana | 1 | 66.6 | 11 | DD |

|     |                      |         |   |      |    |    |
|-----|----------------------|---------|---|------|----|----|
| 852 | Columbia-Rambouillet | Montana | 1 | 66.6 | 11 | II |
| 853 | Columbia-Rambouillet | Montana | 6 | 66.5 | 11 | DD |
| 854 | Columbia-Rambouillet | Montana | 3 | 64.6 | 11 | DD |
| 855 | Columbia-Rambouillet | Montana | 3 | 57.8 | 11 | DD |
| 856 | Columbia-Rambouillet | Montana | 3 | 56.4 | 11 | ID |
| 857 | Columbia-Rambouillet | Montana | 2 | 55.3 | 11 | DD |
| 858 | Columbia-Rambouillet | Montana | 3 | 55.2 | 11 | ID |
| 859 | Columbia-Rambouillet | Montana | 4 | 53.9 | 11 | ID |
| 860 | Columbia-Rambouillet | Montana | 1 | 53.5 | 11 | ID |
| 861 | Columbia-Rambouillet | Montana | . | 52.2 | 11 | DD |
| 862 | Columbia-Rambouillet | Montana | 2 | 50.5 | 11 | II |
| 863 | Columbia-Rambouillet | Montana | 2 | 50.4 | 11 | II |
| 864 | Columbia-Rambouillet | Montana | 3 | 48.4 | 11 | ID |
| 865 | Columbia-Rambouillet | Montana | 3 | 48.2 | 11 | II |
| 866 | Columbia-Rambouillet | Montana | 1 | 47.3 | 11 | ID |
| 867 | Columbia-Rambouillet | Montana | 2 | 45   | 11 | II |
| 868 | Columbia-Rambouillet | Montana | 2 | 41.6 | 11 | II |
| 869 | Columbia-Rambouillet | Montana | . | 40.7 | 11 | DD |
| 870 | Columbia-Rambouillet | Montana | 1 | 40.6 | 11 | DD |
| 871 | Columbia-Rambouillet | Montana | 3 | 40.4 | 11 | DD |
| 872 | Columbia-Rambouillet | Montana | 3 | 40   | 11 | ID |
| 873 | Columbia-Rambouillet | Montana | 5 | 39.2 | 11 | ID |
| 874 | Columbia-Rambouillet | Montana | 8 | 39   | 11 | II |
| 875 | Columbia-Rambouillet | Montana | 6 | 39   | 11 | DD |
| 876 | Columbia-Rambouillet | Montana | . | 37.4 | 11 | .  |
| 877 | Columbia-Rambouillet | Montana | . | 35.5 | 11 | .  |
| 878 | Columbia-Rambouillet | Montana | 5 | 33.8 | 11 | ID |
| 879 | Columbia-Rambouillet | Montana | 3 | 32.9 | 11 | ID |
| 880 | Columbia-Rambouillet | Montana | 1 | 31.8 | 11 | II |
| 881 | Columbia-Rambouillet | Montana | 1 | 28.5 | 11 | ID |
| 882 | Columbia-Rambouillet | Montana | . | 27.9 | 11 | DD |
| 883 | Columbia-Rambouillet | Montana | 1 | 27.2 | 11 | ID |
| 884 | Columbia-Rambouillet | Montana | 3 | 26   | 11 | II |
| 885 | Columbia-Rambouillet | Montana | 1 | 24.6 | 11 | ID |
| 886 | Columbia-Rambouillet | Montana | 3 | 24.3 | 11 | DD |
| 887 | Columbia-Rambouillet | Montana | 3 | 24.1 | 11 | ID |
| 888 | Columbia-Rambouillet | Montana | 6 | 22.2 | 11 | ID |
| 889 | Columbia-Rambouillet | Montana | . | 22   | 11 | II |
| 890 | Columbia-Rambouillet | Montana | 7 | 21.8 | 11 | DD |
| 891 | Columbia-Rambouillet | Montana | 2 | 21.3 | 11 | ID |
| 892 | Columbia-Rambouillet | Montana | . | 20.8 | 11 | ID |
| 893 | Columbia-Rambouillet | Montana | 3 | 20.3 | 11 | ID |
| 894 | Columbia-Rambouillet | Montana | . | 20.1 | 11 | II |

|     |                      |            |   |      |    |    |
|-----|----------------------|------------|---|------|----|----|
| 895 | Columbia-Rambouillet | Montana    | 3 | 19.7 | 11 | II |
| 896 | Columbia-Rambouillet | Montana    | 1 | 19.6 | 11 | DD |
| 897 | Columbia-Rambouillet | Montana    | 1 | 19.1 | 11 | DD |
| 898 | Columbia-Rambouillet | Montana    | 1 | 19   | 11 | ID |
| 899 | Columbia-Rambouillet | Montana    | 1 | 17.3 | 11 | ID |
| 900 | Columbia-Rambouillet | Montana    | . | 17.1 | 11 | II |
| 901 | Columbia-Rambouillet | Montana    | 2 | 16   | 11 | ID |
| 902 | Columbia-Rambouillet | Montana    | 1 | 14.6 | 11 | II |
| 903 | Columbia-Rambouillet | Montana    | 3 | 14.5 | 11 | ID |
| 904 | Columbia-Rambouillet | Montana    | 1 | 13.3 | 11 | ID |
| 905 | Columbia-Rambouillet | Montana    | 3 | 13   | 11 | II |
| 906 | Columbia-Rambouillet | Montana    | 3 | 12.2 | 11 | II |
| 907 | Columbia-Rambouillet | Montana    | 1 | 11.8 | 11 | ID |
| 908 | Columbia-Rambouillet | Montana    | . | 11.4 | 11 | ID |
| 909 | Columbia-Rambouillet | Montana    | 3 | 11.2 | 11 | II |
| 910 | Columbia-Rambouillet | Montana    | 3 | 11.1 | 11 | ID |
| 911 | Columbia-Rambouillet | Montana    | 1 | 11   | 11 | II |
| 912 | Columbia-Rambouillet | Montana    | 3 | .    | 11 | ID |
| 913 | Columbia-Rambouillet | Montana    | 5 | .    | 11 | DD |
| 914 | Columbia-Rambouillet | Montana    | 3 | .    | 11 | ID |
| 915 | Columbia-Rambouillet | Montana    | 7 | .    | 11 | DD |
| 916 | Columbia-Rambouillet | Montana    | 3 | .    | 11 | DD |
| 917 | Columbia-Rambouillet | Montana    | 3 | .    | 11 | DD |
| 918 | Columbia-Rambouillet | Montana    | 6 | .    | 11 | DD |
| 919 | Columbia-Rambouillet | Montana    | 3 | .    | 11 | ID |
| 920 | Columbia-Rambouillet | Montana    | 3 | .    | 11 | ID |
| 921 | Columbia-Rambouillet | Montana    | 3 | .    | 11 | II |
| 922 | Columbia-Rambouillet | Montana    | 2 | .    | 11 | ID |
| 923 | Columbia-Rambouillet | Montana    | 5 | .    | 11 | ID |
| 924 | Columbia-Rambouillet | Montana    | 2 | .    | 11 | II |
| 925 | Columbia-Rambouillet | Montana    | 6 | 1830 | 14 | DD |
| 926 | Columbia-Rambouillet | Montana    | 7 | 1250 | 14 | II |
| 927 | Columbia-Rambouillet | Montana    | . | 823  | 14 | DD |
| 928 | Columbia-Rambouillet | Montana    | 1 | 275  | 14 | II |
| 929 | Columbia-Rambouillet | Montana    | 7 | 178  | 14 | ID |
| 930 | Columbia-Rambouillet | Montana    | 1 | 172  | 14 | ID |
| 931 | Columbia-Rambouillet | Montana    | 2 | 140  | 14 | ID |
| 932 | Columbia-Rambouillet | Montana    | 7 | 51.6 | 14 | II |
| 933 | Columbia-Rambouillet | Montana    | . | 55.8 | 23 | ID |
| 934 | Columbia-Rambouillet | Montana    | . | 311  | 24 | ID |
| 935 | Columbia-Rambouillet | Montana    | . | 173  | 24 | II |
| 936 | Columbia-Rambouillet | Montana    | . | 27.3 | 24 | II |
| 937 | Columbia             | Idaho 2004 | 4 | 169  | 11 | ID |

|     |          |            |   |       |    |    |
|-----|----------|------------|---|-------|----|----|
| 938 | Columbia | Idaho 2004 | 5 | 132   | 11 | II |
| 939 | Columbia | Idaho 2004 | 4 | 992   | 11 | ID |
| 940 | Columbia | Idaho 2004 | 5 | .     | 11 | ID |
| 941 | Columbia | Idaho 2004 | 6 | 21    | 11 | II |
| 942 | Columbia | Idaho 2004 | 3 | 305   | .  | ID |
| 943 | Columbia | Idaho 2004 | 6 | 601   | 11 | ID |
| 944 | Columbia | Idaho 2004 | 4 | 15    | 11 | II |
| 945 | Columbia | Idaho 2004 | 4 | .     | 11 | ID |
| 946 | Columbia | Idaho 2004 | 4 | 7660  | 11 | ID |
| 947 | Columbia | Idaho 2004 | 5 | 2     | 11 | ID |
| 948 | Columbia | Idaho 2004 | 5 | 187   | 11 | DD |
| 949 | Columbia | Idaho 2004 | 4 | 13400 | 11 | DD |
| 950 | Columbia | Idaho 2004 | 4 | 104   | .  | DD |
| 951 | Columbia | Idaho 2004 | 6 | 1880  | 11 | II |
| 952 | Columbia | Idaho 2004 | 3 | .     | 11 | ID |
| 953 | Columbia | Idaho 2004 | 6 | 63    | 11 | II |
| 954 | Columbia | Idaho 2004 | 3 | .     | 11 | DD |
| 955 | Columbia | Idaho 2004 | 4 | 235   | 11 | ID |
| 956 | Columbia | Idaho 2004 | 5 | 1130  | 11 | II |
| 957 | Columbia | Idaho 2004 | 3 | 1360  | 11 | ID |
| 958 | Columbia | Idaho 2004 | 6 | 63    | .  | DD |
| 959 | Columbia | Idaho 2004 | 5 | 1520  | 11 | ID |
| 960 | Columbia | Idaho 2004 | 5 | 288   | 11 | DD |
| 961 | Columbia | Idaho 2004 | 4 | 26    | 11 | II |
| 962 | Columbia | Idaho 2004 | 6 | 11700 | 11 | ID |
| 963 | Columbia | Idaho 2004 | 5 | 1170  | 11 | ID |
| 964 | Columbia | Idaho 2004 | 6 | 755   | 11 | ID |
| 965 | Columbia | Idaho 2004 | 4 | 613   | 11 | DD |
| 966 | Columbia | Idaho 2004 | 5 | 34    | .  | ID |
| 967 | Columbia | Idaho 2004 | 3 | .     | 11 | ID |
| 968 | Columbia | Idaho 2004 | 4 | 183   | 11 | II |
| 969 | Columbia | Idaho 2004 | 3 | .     | 11 | ID |
| 970 | Columbia | Idaho 2004 | 6 | .     | 11 | DD |
| 971 | Columbia | Idaho 2004 | 5 | 33    | .  | II |
| 972 | Columbia | Idaho 2004 | 6 | 218   | .  | ID |
| 973 | Columbia | Idaho 2004 | 4 | 241   | 11 | ID |
| 974 | Columbia | Idaho 2004 | 3 | 34    | 11 | DD |
| 975 | Columbia | Idaho 2004 | 3 | .     | 11 | II |
| 976 | Columbia | Idaho 2004 | 3 | .     | 11 | ID |
| 977 | Columbia | Idaho 2004 | 5 | .     | 13 | II |
| 978 | Columbia | Idaho 2004 | 3 | 233   | 11 | ID |
| 979 | Columbia | Idaho 2004 | 3 | 321   | 11 | ID |
| 980 | Columbia | Idaho 2004 | 5 | 267   | .  | II |

|      |          |            |   |       |    |    |
|------|----------|------------|---|-------|----|----|
| 981  | Columbia | Idaho 2004 | 5 | .     | 11 | II |
| 982  | Columbia | Idaho 2004 | 6 | 267   | .  | DD |
| 983  | Columbia | Idaho 2004 | 3 | .     | 11 | ID |
| 984  | Columbia | Idaho 2004 | 3 | .     | 11 | ID |
| 985  | Columbia | Idaho 2004 | 5 | 7     | 11 | DD |
| 986  | Columbia | Idaho 2004 | 3 | 721   | 11 | ID |
| 987  | Columbia | Idaho 2004 | 3 | .     | 11 | ID |
| 988  | Columbia | Idaho 2004 | 5 | 2260  | 11 | ID |
| 989  | Columbia | Idaho 2004 | 5 | .     | 11 | II |
| 990  | Columbia | Idaho 2004 | 5 | 2     | 11 | DD |
| 991  | Columbia | Idaho 2004 | 3 | .     | .  | ID |
| 992  | Columbia | Idaho 2004 | 5 | 98    | 11 | DD |
| 993  | Columbia | Idaho 2004 | 3 | .     | 11 | ID |
| 994  | Columbia | Idaho 2004 | 3 | 305   | 11 | ID |
| 995  | Columbia | Idaho 2004 | 4 | 416   | .  | ID |
| 996  | Columbia | Idaho 2004 | 3 | .     | 11 | II |
| 997  | Columbia | Idaho 2004 | 5 | 956   | 11 | DD |
| 998  | Columbia | Idaho 2004 | 5 | 3910  | 11 | ID |
| 999  | Columbia | Idaho 2004 | 6 | 605   | 11 | ID |
| 1000 | Columbia | Idaho 2004 | 3 | 9     | 11 | II |
| 1001 | Columbia | Idaho 2004 | 5 | 5240  | 11 | II |
| 1002 | Columbia | Idaho 2004 | 5 | 416   | 11 | ID |
| 1003 | Columbia | Idaho 2004 | 3 | .     | 11 | ID |
| 1004 | Columbia | Idaho 2004 | 3 | 470   | 11 | DD |
| 1005 | Columbia | Idaho 2004 | 6 | 2590  | 11 | ID |
| 1006 | Columbia | Idaho 2004 | 3 | 113   | 11 | ID |
| 1007 | Columbia | Idaho 2004 | 4 | 3910  | 11 | II |
| 1008 | Columbia | Idaho 2004 | 5 | .     | 11 | ID |
| 1009 | Columbia | Idaho 2004 | 4 | 31    | .  | DD |
| 1010 | Columbia | Idaho 2004 | 6 | 9     | 11 | ID |
| 1011 | Columbia | Idaho 2004 | 6 | 576   | 11 | ID |
| 1012 | Columbia | Idaho 2004 | 6 | 58    | 11 | ID |
| 1013 | Columbia | Idaho 2004 | 3 | .     | .  | ID |
| 1014 | Columbia | Idaho 2004 | 6 | 2550  | 11 | ID |
| 1015 | Columbia | Idaho 2004 | 3 | 441   | .  | ID |
| 1016 | Columbia | Idaho 2004 | 3 | .     | 11 | ID |
| 1017 | Columbia | Idaho 2004 | 4 | .     | 11 | ID |
| 1018 | Columbia | Idaho 2004 | 3 | 213   | 11 | II |
| 1019 | Columbia | Idaho 2004 | 3 | .     | 11 | ID |
| 1020 | Columbia | Idaho 2004 | 6 | 1540  | 11 | II |
| 1021 | Columbia | Idaho 2004 | 3 | 403   | 11 | ID |
| 1022 | Columbia | Idaho 2004 | 3 | 50600 | 11 | ID |
| 1023 | Columbia | Idaho 2004 | 3 | 297   | 11 | DD |



|      |          |            |     |       |    |    |
|------|----------|------------|-----|-------|----|----|
| 1024 | Columbia | Idaho 2004 | 4   | .     | 11 | ID |
| 1025 | Columbia | Idaho 2004 | 6   | 921   | .  | ID |
| 1026 | Columbia | Idaho 2004 | 5   | 531   | 11 | II |
| 1027 | Columbia | Idaho 2004 | 6   | 193   | 11 | ID |
| 1028 | Columbia | Idaho 2004 | 3   | .     | 11 | ID |
| 1029 | Columbia | Idaho 2004 | 6   | 928   | 11 | II |
| 1030 | Columbia | Idaho 2004 | 3   | 693   | 11 | II |
| 1031 | Columbia | Idaho 2004 | 5   | 824   | 11 | ID |
| 1032 | Columbia | Idaho 2004 | 3   | .     | 11 | II |
| 1033 | Columbia | Idaho 2004 | 5   | 4130  | 11 | ID |
| 1034 | Columbia | Idaho 2004 | 3   | 702   | 11 | ID |
| 1035 | Columbia | Idaho 2004 | 4   | .     | 11 | DD |
| 1036 | Columbia | Idaho 2004 | 4   | 1880  | 11 | ID |
| 1037 | Columbia | Idaho 2004 | 4   | .     | 11 | ID |
| 1038 | Columbia | Idaho 2004 | 4   | 411   | 11 | ID |
| 1039 | Columbia | Idaho 2004 | 4   | .     | 11 | ID |
| 1040 | Columbia | Idaho 2004 | 3   | .     | 11 | II |
| 1041 | Columbia | Idaho 2004 | 4   | .     | .  | II |
| 1042 | Columbia | Idaho 2004 | 5   | 448   | 11 | II |
| 1043 | Columbia | Idaho 2004 | 4   | 892   | 11 | II |
| 1044 | Columbia | Idaho 2004 | 5   | 1460  | 11 | ID |
| 1045 | Polypay  | Idaho 2004 | 3   | .     | .  | II |
| 1046 | Polypay  | Idaho 2004 | 5   | .     | 13 | II |
| 1047 | Polypay  | Idaho 2004 | 5   | 2290  | 11 | ID |
| 1048 | Polypay  | Idaho 2004 | 5.5 | 19000 | 12 | II |
| 1049 | Polypay  | Idaho 2004 | 5.5 | 6230  | 11 | II |
| 1050 | Polypay  | Idaho 2004 | 6   | .     | 11 | II |
| 1051 | Polypay  | Idaho 2004 | 5   | 5640  | 12 | ID |
| 1052 | Polypay  | Idaho 2004 | 3   | .     | 11 | II |
| 1053 | Polypay  | Idaho 2004 | 6   | 303   | 11 | ID |
| 1054 | Polypay  | Idaho 2004 | 6   | 118   | 11 | ID |
| 1055 | Polypay  | Idaho 2004 | 5   | 234   | 11 | ID |
| 1056 | Polypay  | Idaho 2004 | 5   | .     | 11 | II |
| 1057 | Polypay  | Idaho 2004 | 4   | .     | 11 | ID |
| 1058 | Polypay  | Idaho 2004 | 6   | 12300 | .  | ID |
| 1059 | Polypay  | Idaho 2004 | 5   | 636   | 11 | ID |
| 1060 | Polypay  | Idaho 2004 | 5   | .     | 11 | ID |
| 1061 | Polypay  | Idaho 2004 | 4   | 339   | 11 | ID |
| 1062 | Polypay  | Idaho 2004 | 3   | .     | 11 | ID |
| 1063 | Polypay  | Idaho 2004 | 3   | 72    | 11 | ID |
| 1064 | Polypay  | Idaho 2004 | 4   | 17    | 11 | II |
| 1065 | Polypay  | Idaho 2004 | 4   | 507   | 11 | ID |
| 1066 | Polypay  | Idaho 2004 | 5.5 | 150   | 11 | ID |

|      |         |            |     |       |    |    |
|------|---------|------------|-----|-------|----|----|
| 1067 | Polypay | Idaho 2004 | 5   | 11900 | 11 | II |
| 1068 | Polypay | Idaho 2004 | 5.5 | .     | 11 | II |
| 1069 | Polypay | Idaho 2004 | 3   | .     | 11 | ID |
| 1070 | Polypay | Idaho 2004 | 3   | 463   | .  | ID |
| 1071 | Polypay | Idaho 2004 | 3   | 558   | 11 | ID |
| 1072 | Polypay | Idaho 2004 | 5.5 | 601   | .  | II |
| 1073 | Polypay | Idaho 2004 | 5   | 1590  | .  | II |
| 1074 | Polypay | Idaho 2004 | 5   | 852   | 13 | II |
| 1075 | Polypay | Idaho 2004 | 4   | 683   | 13 | ID |
| 1076 | Polypay | Idaho 2004 | 5   | 39    | 14 | II |
| 1077 | Polypay | Idaho 2004 | 4   | .     | 11 | II |
| 1078 | Polypay | Idaho 2004 | 5.5 | .     | 23 | II |
| 1079 | Polypay | Idaho 2004 | 3   | .     | 11 | II |
| 1080 | Polypay | Idaho 2004 | 3   | .     | 11 | II |
| 1081 | Polypay | Idaho 2004 | 5   | 159   | 11 | II |
| 1082 | Polypay | Idaho 2004 | 3   | 516   | 11 | ID |
| 1083 | Polypay | Idaho 2004 | 6   | 72    | 13 | II |
| 1084 | Polypay | Idaho 2004 | 5   | 2820  | 11 | II |
| 1085 | Polypay | Idaho 2004 | 6   | .     | 11 | ID |
| 1086 | Polypay | Idaho 2004 | 3   | 961   | 12 | II |
| 1087 | Polypay | Idaho 2004 | 3   | 1660  | 11 | II |
| 1088 | Polypay | Idaho 2004 | 3   | .     | 11 | ID |
| 1089 | Polypay | Idaho 2004 | 3   | 143   | 11 | II |
| 1090 | Polypay | Idaho 2004 | 4   | .     | 11 | II |
| 1091 | Polypay | Idaho 2004 | 4   | .     | 11 | ID |
| 1092 | Polypay | Idaho 2004 | 5   | .     | 13 | ID |
| 1093 | Polypay | Idaho 2004 | 5   | 264   | 11 | II |
| 1094 | Polypay | Idaho 2004 | 3   | .     | 11 | II |
| 1095 | Polypay | Idaho 2004 | 3   | .     | .  | II |
| 1096 | Polypay | Idaho 2004 | 6   | 33    | 11 | DD |
| 1097 | Polypay | Idaho 2004 | 4   | 798   | 11 | II |
| 1098 | Polypay | Idaho 2004 | 4   | 50    | 11 | II |
| 1099 | Polypay | Idaho 2004 | 6   | 695   | 11 | II |
| 1100 | Polypay | Idaho 2004 | 3   | 50    | .  | II |
| 1101 | Polypay | Idaho 2004 | 4   | .     | 11 | ID |
| 1102 | Polypay | Idaho 2004 | 4   | 408   | .  | II |
| 1103 | Polypay | Idaho 2004 | 4   | 62700 | 11 | ID |
| 1104 | Polypay | Idaho 2004 | 4   | .     | 11 | II |
| 1105 | Polypay | Idaho 2004 | 5   | .     | 11 | II |
| 1106 | Polypay | Idaho 2004 | 3   | .     | 14 | ID |
| 1107 | Polypay | Idaho 2004 | 3   | .     | 11 | II |
| 1108 | Polypay | Idaho 2004 | 6   | 1170  | 11 | ID |
| 1109 | Polypay | Idaho 2004 | 6   | 1150  | 11 | ID |

|      |         |            |   |      |    |    |
|------|---------|------------|---|------|----|----|
| 1110 | Polypay | Idaho 2004 | 4 | .    | 11 | ID |
| 1111 | Polypay | Idaho 2004 | 3 | .    | 11 | II |
| 1112 | Polypay | Idaho 2004 | 4 | .    | 11 | ID |
| 1113 | Polypay | Idaho 2004 | 4 | .    | .  | II |
| 1114 | Polypay | Idaho 2004 | 4 | .    | 11 | ID |
| 1115 | Polypay | Idaho 2004 | 4 | .    | 11 | II |
| 1116 | Polypay | Idaho 2004 | 6 | .    | 12 | ID |
| 1117 | Polypay | Idaho 2004 | 5 | .    | 11 | ID |
| 1118 | Polypay | Idaho 2004 | 5 | 59   | .  | ID |
| 1119 | Polypay | Idaho 2004 | 3 | 46   | 11 | II |
| 1120 | Polypay | Idaho 2004 | 3 | .    | 11 | II |
| 1121 | Polypay | Idaho 2004 | 4 | 1120 | 11 | II |
| 1122 | Polypay | Idaho 2004 | 5 | .    | 11 | II |
| 1123 | Polypay | Idaho 2004 | 3 | 1080 | 11 | II |
| 1124 | Polypay | Idaho 2004 | 3 | 221  | 13 | ID |
| 1125 | Polypay | Idaho 2004 | 5 | 1420 | 11 | ID |
| 1126 | Polypay | Idaho 2004 | 6 | .    | 11 | ID |
| 1127 | Polypay | Idaho 2004 | 5 | 0    | 11 | II |
| 1128 | Polypay | Idaho 2004 | 4 | .    | 11 | II |
| 1129 | Polypay | Idaho 2004 | 4 | .    | 11 | DD |
| 1130 | Polypay | Idaho 2004 | 6 | 332  | .  | II |
| 1131 | Polypay | Idaho 2004 | 4 | .    | 11 | II |
| 1132 | Polypay | Idaho 2004 | 5 | 297  | 11 | II |
| 1133 | Polypay | Idaho 2004 | 6 | 1420 | 11 | II |
| 1134 | Polypay | Idaho 2004 | 6 | 360  | 11 | II |
| 1135 | Polypay | Idaho 2004 | 4 | 84   | .  | II |
| 1136 | Polypay | Idaho 2004 | 4 | 6510 | .  | ID |
| 1137 | Polypay | Idaho 2004 | 3 | .    | 11 | ID |
| 1138 | Polypay | Idaho 2004 | 4 | .    | 11 | ID |
| 1139 | Polypay | Idaho 2004 | 3 | 199  | 11 | ID |
| 1140 | Polypay | Idaho 2004 | 3 | .    | 12 | II |
| 1141 | Polypay | Idaho 2004 | 5 | 3870 | 11 | II |
| 1142 | Polypay | Idaho 2004 | 5 | .    | 11 | DD |
| 1143 | Polypay | Idaho 2004 | 3 | .    | 11 | ID |
| 1144 | Polypay | Idaho 2004 | 4 | 5.3  | 11 | DD |
| 1145 | Polypay | Idaho 2004 | 5 | 699  | 11 | II |
| 1146 | Polypay | Idaho 2004 | 6 | 4.9  | 11 | II |
| 1147 | Polypay | Idaho 2004 | 5 | 959  | 11 | ID |
| 1148 | Polypay | Idaho 2004 | 5 | .    | 11 | II |
| 1149 | Polypay | Idaho 2004 | 6 | 40   | 11 | II |
| 1150 | Polypay | Idaho 2004 | 4 | .    | 11 | II |
| 1151 | Polypay | Idaho 2004 | 4 | 92   | .  | ID |
| 1152 | Polypay | Idaho 2004 | 4 | ..   | 11 | ID |

|      |             |            |   |      |    |    |
|------|-------------|------------|---|------|----|----|
| 1153 | Polypay     | Idaho 2004 | 4 | 100  | 11 | ID |
| 1154 | Polypay     | Idaho 2004 | 3 | .    | 11 | ID |
| 1155 | Polypay     | Idaho 2004 | 3 | 40   | 13 | ID |
| 1156 | Polypay     | Idaho 2004 | 5 | 1790 | 11 | ID |
| 1157 | Polypay     | Idaho 2004 | 5 | .    | 11 | ID |
| 1158 | Polypay     | Idaho 2004 | 5 | .    | 11 | II |
| 1159 | Polypay     | Idaho 2004 | 4 | .    | 11 | ID |
| 1160 | Polypay     | Idaho 2004 | 4 | .    | 11 | DD |
| 1161 | Polypay     | Idaho 2004 | 3 | 33   | 11 | II |
| 1162 | Polypay     | Idaho 2004 | 5 | .    | 11 | II |
| 1163 | Polypay     | Idaho 2004 | 4 | 59   | 11 | ID |
| 1164 | Polypay     | Idaho 2004 | 4 | .    | .  | ID |
| 1165 | Rambouillet | Idaho 2004 | 5 | 4210 | 11 | ID |
| 1166 | Rambouillet | Idaho 2004 | 4 | 419  | 11 | II |
| 1167 | Rambouillet | Idaho 2004 | 5 | .    | 11 | II |
| 1168 | Rambouillet | Idaho 2004 | 6 | .    | 11 | ID |
| 1169 | Rambouillet | Idaho 2004 | 6 | 262  | 11 | II |
| 1170 | Rambouillet | Idaho 2004 | 5 | 3    | 11 | DD |
| 1171 | Rambouillet | Idaho 2004 | 3 | .    | 11 | DD |
| 1172 | Rambouillet | Idaho 2004 | 4 | .    | .  | II |
| 1173 | Rambouillet | Idaho 2004 | 5 | 148  | 11 | ID |
| 1174 | Rambouillet | Idaho 2004 | 4 | 262  | 11 | ID |
| 1175 | Rambouillet | Idaho 2004 | 4 | 17   | 11 | DD |
| 1176 | Rambouillet | Idaho 2004 | 4 | .    | 11 | ID |
| 1177 | Rambouillet | Idaho 2004 | 4 | 2    | 11 | ID |
| 1178 | Rambouillet | Idaho 2004 | 4 | 36   | 11 | DD |
| 1179 | Rambouillet | Idaho 2004 | 5 | 6    | 11 | ID |
| 1180 | Rambouillet | Idaho 2004 | 4 | 72   | 11 | DD |
| 1181 | Rambouillet | Idaho 2004 | 5 | .    | 11 | II |
| 1182 | Rambouillet | Idaho 2004 | 3 | 222  | 11 | ID |
| 1183 | Rambouillet | Idaho 2004 | 5 | .    | .  | II |
| 1184 | Rambouillet | Idaho 2004 | 5 | .    | 11 | II |
| 1185 | Rambouillet | Idaho 2004 | 6 | .    | 11 | II |
| 1186 | Rambouillet | Idaho 2004 | 6 | 134  | 11 | DD |
| 1187 | Rambouillet | Idaho 2004 | 5 | 255  | .  | II |
| 1188 | Rambouillet | Idaho 2004 | 4 | 330  | .  | II |
| 1189 | Rambouillet | Idaho 2004 | 4 | 13   | 11 | ID |
| 1190 | Rambouillet | Idaho 2004 | 3 | 202  | 13 | II |
| 1191 | Rambouillet | Idaho 2004 | 6 | 2430 | 12 | II |
| 1192 | Rambouillet | Idaho 2004 | 4 | .    | 11 | DD |
| 1193 | Rambouillet | Idaho 2004 | 4 | .    | 11 | ID |
| 1194 | Rambouillet | Idaho 2004 | 4 | 67   | 11 | II |
| 1195 | Rambouillet | Idaho 2004 | 5 | 2    | 11 | DD |

|      |             |            |   |      |     |    |
|------|-------------|------------|---|------|-----|----|
| 1196 | Rambouillet | Idaho 2004 | 6 | .    | 11  | II |
| 1197 | Rambouillet | Idaho 2004 | 3 | .    | 11  | II |
| 1198 | Rambouillet | Idaho 2004 | 5 | .    | 11  | II |
| 1199 | Rambouillet | Idaho 2004 | 5 | 3    | 11  | II |
| 1200 | Rambouillet | Idaho 2004 | 6 | 23   | 11  | II |
| 1201 | Rambouillet | Idaho 2004 | 4 | 191  | 11  | DD |
| 1202 | Rambouillet | Idaho 2004 | 3 | 89   | 11  | ID |
| 1203 | Rambouillet | Idaho 2004 | 3 | 239  | 11  | II |
| 1204 | Rambouillet | Idaho 2004 | 3 | 242  | 11  | ID |
| 1205 | Rambouillet | Idaho 2004 | 3 | 298  | 110 | ID |
| 1206 | Rambouillet | Idaho 2004 | 3 | .    | 13  | II |
| 1207 | Rambouillet | Idaho 2004 | 4 | 1010 | 11  | ID |
| 1208 | Rambouillet | Idaho 2004 | 5 | .    | 11  | II |
| 1209 | Rambouillet | Idaho 2004 | 3 | 188  | 12  | II |
| 1210 | Rambouillet | Idaho 2004 | 5 | 73   | .   | ID |
| 1211 | Rambouillet | Idaho 2004 | 3 | 2    | 11  | ID |
| 1212 | Rambouillet | Idaho 2004 | 5 | 875  | 11  | ID |
| 1213 | Rambouillet | Idaho 2004 | 5 | 1560 | 11  | II |
| 1214 | Rambouillet | Idaho 2004 | 5 | .    | 11  | ID |
| 1215 | Rambouillet | Idaho 2004 | 5 | .    | 11  | ID |
| 1216 | Rambouillet | Idaho 2004 | 4 | 1700 | 33  | ID |
| 1217 | Rambouillet | Idaho 2004 | 4 | .    | 11  | II |
| 1218 | Rambouillet | Idaho 2004 | 6 | 48   | 11  | II |
| 1219 | Rambouillet | Idaho 2004 | 3 | .    | 11  | II |
| 1220 | Rambouillet | Idaho 2004 | 4 | .    | 11  | DD |
| 1221 | Rambouillet | Idaho 2004 | 5 | 4    | 110 | II |
| 1222 | Rambouillet | Idaho 2004 | 6 | 65   | 13  | II |
| 1223 | Rambouillet | Idaho 2004 | 6 | .    | 11  | II |
| 1224 | Rambouillet | Idaho 2004 | 3 | .    | 11  | II |
| 1225 | Rambouillet | Idaho 2004 | 3 | 215  | 11  | ID |
| 1226 | Rambouillet | Idaho 2004 | 4 | 228  | 11  | ID |
| 1227 | Rambouillet | Idaho 2004 | 6 | .    | 11  | II |
| 1228 | Rambouillet | Idaho 2004 | 4 | 1240 | 11  | ID |
| 1229 | Rambouillet | Idaho 2004 | 3 | 1530 | 12  | ID |
| 1230 | Rambouillet | Idaho 2004 | 4 | 435  | .   | II |
| 1231 | Rambouillet | Idaho 2004 | 5 | .    | 11  | ID |
| 1232 | Rambouillet | Idaho 2004 | 4 | 221  | 11  | II |
| 1233 | Rambouillet | Idaho 2004 | 6 | 110  | 11  | II |
| 1234 | Rambouillet | Idaho 2004 | 6 | .    | 11  | ID |
| 1235 | Rambouillet | Idaho 2004 | 6 | .    | 11  | ID |
| 1236 | Rambouillet | Idaho 2004 | 3 | .    | 11  | II |
| 1237 | Rambouillet | Idaho 2004 | 3 | .    | .   | ID |
| 1238 | Rambouillet | Idaho 2004 | 6 | 13   | .   | ID |

|      |             |            |   |      |    |    |
|------|-------------|------------|---|------|----|----|
| 1239 | Rambouillet | Idaho 2004 | 5 | .    | 11 | ID |
| 1240 | Rambouillet | Idaho 2004 | 5 | .    | 11 | ID |
| 1241 | Rambouillet | Idaho 2004 | 3 | 343  | 11 | II |
| 1242 | Rambouillet | Idaho 2004 | 3 | 9    | 11 | II |
| 1243 | Rambouillet | Idaho 2004 | 4 | 295  | .  | ID |
| 1244 | Rambouillet | Idaho 2004 | 3 | .    | 11 | II |
| 1245 | Rambouillet | Idaho 2004 | 4 | .    | 11 | II |
| 1246 | Rambouillet | Idaho 2004 | 6 | 143  | 11 | II |
| 1247 | Rambouillet | Idaho 2004 | 4 | 12   | 11 | II |
| 1248 | Rambouillet | Idaho 2004 | 5 | .    | 11 | DD |
| 1249 | Rambouillet | Idaho 2004 | 4 | 58   | 11 | ID |
| 1250 | Rambouillet | Idaho 2004 | 5 | .    | 11 | II |
| 1251 | Rambouillet | Idaho 2004 | 5 | 2    | 11 | ID |
| 1252 | Rambouillet | Idaho 2004 | 4 | .    | 11 | II |
| 1253 | Rambouillet | Idaho 2004 | 6 | 11   | 13 | II |
| 1254 | Rambouillet | Idaho 2004 | 3 | .    | 11 | ID |
| 1255 | Rambouillet | Idaho 2004 | 4 | 141  | 13 | II |
| 1256 | Rambouillet | Idaho 2004 | 3 | 78   | 11 | II |
| 1257 | Rambouillet | Idaho 2004 | 5 | 87   | 11 | II |
| 1258 | Rambouillet | Idaho 2004 | 5 | .    | .  | II |
| 1259 | Rambouillet | Idaho 2004 | 6 | .    | .  | II |
| 1260 | Rambouillet | Idaho 2004 | 3 | .    | 12 | II |
| 1261 | Rambouillet | Idaho 2004 | 6 | 35   | 11 | II |
| 1262 | Rambouillet | Idaho 2004 | 5 | .    | .  | II |
| 1263 | Rambouillet | Idaho 2004 | 3 | 2920 | 13 | ID |
| 1264 | Rambouillet | Idaho 2004 | 3 | .    | 11 | II |
| 1265 | Rambouillet | Idaho 2004 | 3 | 504  | .  | II |
| 1266 | Rambouillet | Idaho 2004 | 3 | 66   | 11 | ID |
| 1267 | Rambouillet | Idaho 2004 | 5 | 45   | 11 | ID |
| 1268 | Rambouillet | Idaho 2004 | 4 | .    | 11 | ID |
| 1269 | Rambouillet | Idaho 2004 | 5 | .    | 11 | II |
| 1270 | Rambouillet | Idaho 2004 | 4 | 69   | .  | ID |
| 1271 | Rambouillet | Idaho 2004 | 5 | .    | 11 | II |
| 1272 | Rambouillet | Idaho 2004 | 5 | 3620 | 11 | DD |
| 1273 | Rambouillet | Idaho 2004 | 6 | 23   | 11 | II |
| 1274 | Rambouillet | Idaho 2004 | 3 | 2600 | 11 | ID |
| 1275 | Rambouillet | Idaho 2004 | 6 | .    | 11 | II |
| 1276 | Rambouillet | Idaho 2004 | 5 | 1910 | 11 | ID |
| 1277 | Rambouillet | Idaho 2004 | 4 | 114  | 13 | ID |
| 1278 | Rambouillet | Idaho 2004 | 5 | 35   | 11 | DD |
| 1279 | Rambouillet | Idaho 2004 | 3 | 13   | .  | II |
| 1280 | Rambouillet | Idaho 2004 | 4 | 512  | 11 | ID |
| 1281 | Rambouillet | Idaho 2004 | 6 | 22   | 11 | II |

|      |             |            |   |     |    |    |
|------|-------------|------------|---|-----|----|----|
| 1282 | Rambouillet | Idaho 2004 | 6 | .   | 11 | II |
| 1283 | Rambouillet | Idaho 2004 | 3 | .   | 11 | II |
| 1284 | Rambouillet | Idaho 2004 | 3 | .   | 11 | ID |
| 1285 | Rambouillet | Idaho 2004 | 4 | 1   | 11 | ID |
| 1286 | Rambouillet | Idaho 2004 | 6 | .   | 11 | ID |
| 1287 | Rambouillet | Idaho 2004 | 3 | 26  | 13 | II |
| 1288 | Rambouillet | Idaho 2004 | 4 | .   | 11 | ID |
| 1289 | Rambouillet | Idaho 2004 | 4 | 419 | .  | II |
| 1290 | Columbia    | Idaho 2008 | 3 | .   | 11 | DD |
| 1291 | Columbia    | Idaho 2008 | 5 | .   | 11 | ID |
| 1292 | Columbia    | Idaho 2008 | 1 | .   | 11 | ID |
| 1293 | Columbia    | Idaho 2008 | 1 | .   | 11 | II |
| 1294 | Columbia    | Idaho 2008 | 1 | .   | 11 | II |
| 1295 | Columbia    | Idaho 2008 | 2 | .   | 11 | ID |
| 1296 | Columbia    | Idaho 2008 | 3 | .   | 11 | ID |
| 1297 | Columbia    | Idaho 2008 | 3 | .   | 11 | ID |
| 1298 | Columbia    | Idaho 2008 | 3 | .   | 11 | DD |
| 1299 | Columbia    | Idaho 2008 | 3 | .   | 11 | ID |
| 1300 | Columbia    | Idaho 2008 | 3 | .   | 11 | DD |
| 1301 | Columbia    | Idaho 2008 | 3 | .   | 11 | .  |
| 1302 | Columbia    | Idaho 2008 | 3 | .   | 11 | ID |
| 1303 | Columbia    | Idaho 2008 | 3 | .   | 11 | II |
| 1304 | Columbia    | Idaho 2008 | 3 | .   | 11 | II |
| 1305 | Columbia    | Idaho 2008 | 3 | .   | 11 | ID |
| 1306 | Columbia    | Idaho 2008 | 3 | .   | 11 | II |
| 1307 | Columbia    | Idaho 2008 | 3 | .   | 11 | ID |
| 1308 | Columbia    | Idaho 2008 | 1 | .   | 11 | DD |
| 1309 | Columbia    | Idaho 2008 | 4 | .   | 11 | ID |
| 1310 | Columbia    | Idaho 2008 | 4 | .   | 11 | II |
| 1311 | Columbia    | Idaho 2008 | 4 | .   | 11 | II |
| 1312 | Columbia    | Idaho 2008 | 5 | .   | 11 | ID |
| 1313 | Columbia    | Idaho 2008 | 5 | .   | 11 | ID |
| 1314 | Columbia    | Idaho 2008 | 4 | .   | 11 | II |
| 1315 | Columbia    | Idaho 2008 | 1 | .   | 11 | II |
| 1316 | Columbia    | Idaho 2008 | 1 | .   | 11 | DD |
| 1317 | Columbia    | Idaho 2008 | 1 | .   | 11 | ID |
| 1318 | Columbia    | Idaho 2008 | 1 | .   | 11 | II |
| 1319 | Columbia    | Idaho 2008 | 1 | .   | 11 | II |
| 1320 | Columbia    | Idaho 2008 | 1 | .   | 11 | DD |
| 1321 | Columbia    | Idaho 2008 | 1 | .   | 11 | DD |
| 1322 | Columbia    | Idaho 2008 | 1 | .   | 11 | DD |
| 1323 | Columbia    | Idaho 2008 | 1 | .   | 11 | ID |
| 1324 | Columbia    | Idaho 2008 | 1 | .   | 11 | DD |

|      |          |            |   |   |    |    |
|------|----------|------------|---|---|----|----|
| 1325 | Columbia | Idaho 2008 | 1 | . | 11 | ID |
| 1326 | Columbia | Idaho 2008 | 1 | . | 11 | II |
| 1327 | Columbia | Idaho 2008 | 1 | . | 11 | DD |
| 1328 | Columbia | Idaho 2008 | 1 | . | 11 | ID |
| 1329 | Columbia | Idaho 2008 | 1 | . | 11 | ID |
| 1330 | Columbia | Idaho 2008 | 1 | . | 11 | ID |
| 1331 | Columbia | Idaho 2008 | 1 | . | 11 | ID |
| 1332 | Columbia | Idaho 2008 | 1 | . | 11 | DD |
| 1333 | Columbia | Idaho 2008 | 1 | . | 11 | ID |
| 1334 | Columbia | Idaho 2008 | 1 | . | 11 | II |
| 1335 | Columbia | Idaho 2008 | 1 | . | 11 | DD |
| 1336 | Columbia | Idaho 2008 | 1 | . | 11 | II |
| 1337 | Columbia | Idaho 2008 | 1 | . | 11 | ID |
| 1338 | Columbia | Idaho 2008 | 1 | . | 11 | DD |
| 1339 | Columbia | Idaho 2008 | 1 | . | 11 | ID |
| 1340 | Columbia | Idaho 2008 | 1 | . | 11 | DD |
| 1341 | Columbia | Idaho 2008 | 1 | . | 11 | ID |
| 1342 | Columbia | Idaho 2008 | 1 | . | 11 | ID |
| 1343 | Columbia | Idaho 2008 | 1 | . | 11 | II |
| 1344 | Columbia | Idaho 2008 | 1 | . | 11 | DD |
| 1345 | Columbia | Idaho 2008 | 1 | . | 11 | ID |
| 1346 | Columbia | Idaho 2008 | 1 | . | 11 | ID |
| 1347 | Columbia | Idaho 2008 | 1 | . | 11 | ID |
| 1348 | Columbia | Idaho 2008 | 1 | . | 11 | ID |
| 1349 | Columbia | Idaho 2008 | 1 | . | 11 | ID |
| 1350 | Columbia | Idaho 2008 | 1 | . | 11 | II |
| 1351 | Columbia | Idaho 2008 | 1 | . | 11 | ID |
| 1352 | Columbia | Idaho 2008 | 1 | . | 11 | ID |
| 1353 | Columbia | Idaho 2008 | 1 | . | 11 | DD |
| 1354 | Columbia | Idaho 2008 | 1 | . | 11 | ID |
| 1355 | Columbia | Idaho 2008 | 2 | . | 11 | ID |
| 1356 | Columbia | Idaho 2008 | 2 | . | 11 | II |
| 1357 | Columbia | Idaho 2008 | 2 | . | 11 | II |
| 1358 | Columbia | Idaho 2008 | 2 | . | 11 | II |
| 1359 | Columbia | Idaho 2008 | 2 | . | 11 | ID |
| 1360 | Columbia | Idaho 2008 | 2 | . | 11 | II |
| 1361 | Columbia | Idaho 2008 | 2 | . | 11 | II |
| 1362 | Columbia | Idaho 2008 | 2 | . | 11 | ID |
| 1363 | Columbia | Idaho 2008 | 2 | . | 11 | DD |
| 1364 | Columbia | Idaho 2008 | 2 | . | 11 | II |
| 1365 | Columbia | Idaho 2008 | 2 | . | 11 | ID |
| 1366 | Columbia | Idaho 2008 | 2 | . | 11 | ID |
| 1367 | Columbia | Idaho 2008 | 2 | . | 11 | II |



|      |          |            |   |       |    |    |
|------|----------|------------|---|-------|----|----|
| 1368 | Columbia | Idaho 2008 | 2 | .     | 11 | II |
| 1369 | Columbia | Idaho 2008 | 1 | .     | 13 | II |
| 1370 | Columbia | Idaho 2008 | 5 | 106   | 11 | ID |
| 1371 | Columbia | Idaho 2008 | 5 | 109   | 11 | ID |
| 1372 | Columbia | Idaho 2008 | 2 | 113   | 11 | II |
| 1373 | Columbia | Idaho 2008 | 2 | 1140  | 11 | II |
| 1374 | Columbia | Idaho 2008 | 2 | 12    | 11 | DD |
| 1375 | Columbia | Idaho 2008 | 3 | 149   | 11 | ID |
| 1376 | Columbia | Idaho 2008 | 3 | 15.4  | 11 | II |
| 1377 | Columbia | Idaho 2008 | 2 | 15.6  | 11 | ID |
| 1378 | Columbia | Idaho 2008 | 5 | 155   | 11 | II |
| 1379 | Columbia | Idaho 2008 | 3 | 1620  | 11 | II |
| 1380 | Columbia | Idaho 2008 | 4 | 17.8  | 11 | II |
| 1381 | Columbia | Idaho 2008 | 3 | 17100 | 11 | ID |
| 1382 | Columbia | Idaho 2008 | 4 | 1870  | 11 | DD |
| 1383 | Columbia | Idaho 2008 | 3 | 188   | 11 | II |
| 1384 | Columbia | Idaho 2008 | 4 | 19.2  | 11 | DD |
| 1385 | Columbia | Idaho 2008 | 5 | 192   | 11 | ID |
| 1386 | Columbia | Idaho 2008 | 3 | 20.5  | 11 | II |
| 1387 | Columbia | Idaho 2008 | 5 | 205   | 11 | .  |
| 1388 | Columbia | Idaho 2008 | 4 | 2210  | 11 | ID |
| 1389 | Columbia | Idaho 2008 | 1 | 24    | 11 | DD |
| 1390 | Columbia | Idaho 2008 | 5 | 24    | 11 | ID |
| 1391 | Columbia | Idaho 2008 | 5 | 266   | 11 | II |
| 1392 | Columbia | Idaho 2008 | 2 | 28.9  | 11 | II |
| 1393 | Columbia | Idaho 2008 | 3 | 285   | 11 | ID |
| 1394 | Columbia | Idaho 2008 | 3 | 3.16  | 11 | II |
| 1395 | Columbia | Idaho 2008 | 1 | 3.73  | 11 | ID |
| 1396 | Columbia | Idaho 2008 | 2 | 304   | 11 | II |
| 1397 | Columbia | Idaho 2008 | 4 | 309   | 11 | II |
| 1398 | Columbia | Idaho 2008 | 3 | 33500 | 11 | II |
| 1399 | Columbia | Idaho 2008 | 2 | 344   | 11 | II |
| 1400 | Columbia | Idaho 2008 | 3 | 345   | 11 | ID |
| 1401 | Columbia | Idaho 2008 | 3 | 358   | 11 | ID |
| 1402 | Columbia | Idaho 2008 | 4 | 378   | 11 | DD |
| 1403 | Columbia | Idaho 2008 | 2 | 443   | 11 | ID |
| 1404 | Columbia | Idaho 2008 | 3 | 470   | 11 | II |
| 1405 | Columbia | Idaho 2008 | 3 | 48100 | 11 | II |
| 1406 | Columbia | Idaho 2008 | 3 | 4900  | 11 | ID |
| 1407 | Columbia | Idaho 2008 | 2 | 5160  | 11 | ID |
| 1408 | Columbia | Idaho 2008 | 4 | 51900 | 11 | II |
| 1409 | Columbia | Idaho 2008 | 2 | 5420  | 11 | II |
| 1410 | Columbia | Idaho 2008 | 3 | 57.9  | 11 | ID |

|      |          |            |   |      |    |    |
|------|----------|------------|---|------|----|----|
| 1411 | Columbia | Idaho 2008 | 2 | 576  | 11 | II |
| 1412 | Columbia | Idaho 2008 | 4 | 586  | 11 | II |
| 1413 | Columbia | Idaho 2008 | 3 | 61.3 | 11 | ID |
| 1414 | Columbia | Idaho 2008 | 4 | 677  | 11 | DD |
| 1415 | Columbia | Idaho 2008 | 3 | 696  | 11 | ID |
| 1416 | Columbia | Idaho 2008 | 4 | 7.71 | 11 | II |
| 1417 | Columbia | Idaho 2008 | 3 | 732  | 11 | II |
| 1418 | Columbia | Idaho 2008 | 4 | 776  | 11 | II |
| 1419 | Columbia | Idaho 2008 | 2 | 785  | 11 | DD |
| 1420 | Columbia | Idaho 2008 | 4 | 80.5 | 11 | II |
| 1421 | Columbia | Idaho 2008 | 3 | 829  | 11 | DD |
| 1422 | Columbia | Idaho 2008 | 1 | 851  | 11 | ID |
| 1423 | Columbia | Idaho 2008 | 3 | 9.14 | .  | ID |
| 1424 | Columbia | Idaho 2008 | 3 | 9.84 | 11 | ID |
| 1425 | Columbia | Idaho 2008 | 1 | 93   | 11 | II |
| 1426 | Columbia | Idaho 2008 | 2 | 945  | 11 | ID |
| 1427 | Columbia | Idaho 2008 | 2 | 99.3 | 11 | ID |
| 1428 | Polypay  | Idaho 2008 | 1 | .    | 11 | .  |
| 1429 | Polypay  | Idaho 2008 | 1 | .    | 11 | II |
| 1430 | Polypay  | Idaho 2008 | 1 | .    | 11 | II |
| 1431 | Polypay  | Idaho 2008 | 1 | .    | 11 | .  |
| 1432 | Polypay  | Idaho 2008 | 1 | .    | 11 | II |
| 1433 | Polypay  | Idaho 2008 | 1 | .    | 11 | ID |
| 1434 | Polypay  | Idaho 2008 | 2 | .    | .  | .  |
| 1435 | Polypay  | Idaho 2008 | 3 | .    | 11 | ID |
| 1436 | Polypay  | Idaho 2008 | 1 | .    | 11 | ID |
| 1437 | Polypay  | Idaho 2008 | 3 | .    | 11 | ID |
| 1438 | Polypay  | Idaho 2008 | 3 | .    | 11 | II |
| 1439 | Polypay  | Idaho 2008 | 1 | .    | 11 | ID |
| 1440 | Polypay  | Idaho 2008 | 1 | .    | 11 | ID |
| 1441 | Polypay  | Idaho 2008 | 1 | .    | 11 | II |
| 1442 | Polypay  | Idaho 2008 | 1 | .    | 11 | II |
| 1443 | Polypay  | Idaho 2008 | 1 | .    | 11 | ID |
| 1444 | Polypay  | Idaho 2008 | 1 | .    | 11 | ID |
| 1445 | Polypay  | Idaho 2008 | 1 | .    | 11 | II |
| 1446 | Polypay  | Idaho 2008 | 1 | .    | 11 | II |
| 1447 | Polypay  | Idaho 2008 | 1 | .    | 11 | ID |
| 1448 | Polypay  | Idaho 2008 | 1 | .    | 11 | ID |
| 1449 | Polypay  | Idaho 2008 | 1 | .    | 11 | DD |
| 1450 | Polypay  | Idaho 2008 | 1 | .    | 11 | II |
| 1451 | Polypay  | Idaho 2008 | 1 | .    | 11 | ID |
| 1452 | Polypay  | Idaho 2008 | 1 | .    | 11 | ID |
| 1453 | Polypay  | Idaho 2008 | 1 | .    | 11 | ID |

|      |         |            |   |   |    |    |
|------|---------|------------|---|---|----|----|
| 1454 | Polypay | Idaho 2008 | 1 | . | 11 | II |
| 1455 | Polypay | Idaho 2008 | 1 | . | 11 | II |
| 1456 | Polypay | Idaho 2008 | 1 | . | 11 | DD |
| 1457 | Polypay | Idaho 2008 | 1 | . | 11 | II |
| 1458 | Polypay | Idaho 2008 | 1 | . | 11 | ID |
| 1459 | Polypay | Idaho 2008 | 1 | . | 11 | ID |
| 1460 | Polypay | Idaho 2008 | 1 | . | 11 | ID |
| 1461 | Polypay | Idaho 2008 | 3 | . | 11 | II |
| 1462 | Polypay | Idaho 2008 | 1 | . | 11 | ID |
| 1463 | Polypay | Idaho 2008 | 1 | . | 11 | ID |
| 1464 | Polypay | Idaho 2008 | 1 | . | 11 | II |
| 1465 | Polypay | Idaho 2008 | 3 | . | 11 | ID |
| 1466 | Polypay | Idaho 2008 | 1 | . | 11 | ID |
| 1467 | Polypay | Idaho 2008 | 3 | . | 11 | ID |
| 1468 | Polypay | Idaho 2008 | 3 | . | 11 | DD |
| 1469 | Polypay | Idaho 2008 | 3 | . | 11 | ID |
| 1470 | Polypay | Idaho 2008 | 3 | . | 11 | II |
| 1471 | Polypay | Idaho 2008 | 3 | . | 11 | II |
| 1472 | Polypay | Idaho 2008 | 3 | . | 11 | II |
| 1473 | Polypay | Idaho 2008 | 1 | . | 11 | ID |
| 1474 | Polypay | Idaho 2008 | 1 | . | 11 | II |
| 1475 | Polypay | Idaho 2008 | 3 | . | 11 | ID |
| 1476 | Polypay | Idaho 2008 | 1 | . | 11 | II |
| 1477 | Polypay | Idaho 2008 | 1 | . | 11 | DD |
| 1478 | Polypay | Idaho 2008 | 3 | . | 11 | ID |
| 1479 | Polypay | Idaho 2008 | 3 | . | 11 | ID |
| 1480 | Polypay | Idaho 2008 | 3 | . | 11 | ID |
| 1481 | Polypay | Idaho 2008 | 3 | . | 11 | ID |
| 1482 | Polypay | Idaho 2008 | 3 | . | 11 | ID |
| 1483 | Polypay | Idaho 2008 | 1 | . | 11 | .  |
| 1484 | Polypay | Idaho 2008 | 3 | . | 11 | .  |
| 1485 | Polypay | Idaho 2008 | 1 | . | 11 | ID |
| 1486 | Polypay | Idaho 2008 | 1 | . | 11 | DD |
| 1487 | Polypay | Idaho 2008 | 3 | . | 11 | II |
| 1488 | Polypay | Idaho 2008 | 2 | . | 11 | DD |
| 1489 | Polypay | Idaho 2008 | 3 | . | 11 | ID |
| 1490 | Polypay | Idaho 2008 | 3 | . | 11 | .  |
| 1491 | Polypay | Idaho 2008 | 1 | . | 11 | II |
| 1492 | Polypay | Idaho 2008 | 1 | . | 11 | II |
| 1493 | Polypay | Idaho 2008 | 3 | . | 11 | ID |
| 1494 | Polypay | Idaho 2008 | 3 | . | 11 | II |
| 1495 | Polypay | Idaho 2008 | 3 | . | 11 | II |
| 1496 | Polypay | Idaho 2008 | 1 | . | 11 | ID |

|      |         |            |   |   |    |    |
|------|---------|------------|---|---|----|----|
| 1497 | Polypay | Idaho 2008 | 3 | . | 11 | ID |
| 1498 | Polypay | Idaho 2008 | 3 | . | 11 | II |
| 1499 | Polypay | Idaho 2008 | 3 | . | 11 | II |
| 1500 | Polypay | Idaho 2008 | 3 | . | 11 | II |
| 1501 | Polypay | Idaho 2008 | 1 | . | 11 | ID |
| 1502 | Polypay | Idaho 2008 | 1 | . | 11 | ID |
| 1503 | Polypay | Idaho 2008 | 1 | . | 11 | II |
| 1504 | Polypay | Idaho 2008 | 3 | . | 11 | ID |
| 1505 | Polypay | Idaho 2008 | 1 | . | 11 | II |
| 1506 | Polypay | Idaho 2008 | 1 | . | 11 | II |
| 1507 | Polypay | Idaho 2008 | 3 | . | 11 | II |
| 1508 | Polypay | Idaho 2008 | 3 | . | 11 | II |
| 1509 | Polypay | Idaho 2008 | 1 | . | 11 | ID |
| 1510 | Polypay | Idaho 2008 | 3 | . | 11 | ID |
| 1511 | Polypay | Idaho 2008 | 3 | . | 11 | II |
| 1512 | Polypay | Idaho 2008 | 3 | . | 11 | II |
| 1513 | Polypay | Idaho 2008 | 3 | . | 11 | II |
| 1514 | Polypay | Idaho 2008 | 3 | . | 11 | ID |
| 1515 | Polypay | Idaho 2008 | 1 | . | 11 | ID |
| 1516 | Polypay | Idaho 2008 | 1 | . | 11 | II |
| 1517 | Polypay | Idaho 2008 | 1 | . | 11 | ID |
| 1518 | Polypay | Idaho 2008 | 3 | . | 11 | II |
| 1519 | Polypay | Idaho 2008 | 3 | . | 11 | ID |
| 1520 | Polypay | Idaho 2008 | 3 | . | 11 | .  |
| 1521 | Polypay | Idaho 2008 | 3 | . | 11 | .  |
| 1522 | Polypay | Idaho 2008 | 3 | . | 11 | .  |
| 1523 | Polypay | Idaho 2008 | 3 | . | 11 | II |
| 1524 | Polypay | Idaho 2008 | 1 | . | 11 | ID |
| 1525 | Polypay | Idaho 2008 | 3 | . | 11 | II |
| 1526 | Polypay | Idaho 2008 | 3 | . | 11 | .  |
| 1527 | Polypay | Idaho 2008 | 3 | . | 11 | .  |
| 1528 | Polypay | Idaho 2008 | 1 | . | 11 | ID |
| 1529 | Polypay | Idaho 2008 | 1 | . | 11 | II |
| 1530 | Polypay | Idaho 2008 | 3 | . | 11 | ID |
| 1531 | Polypay | Idaho 2008 | 3 | . | 11 | ID |
| 1532 | Polypay | Idaho 2008 | 1 | . | 11 | DD |
| 1533 | Polypay | Idaho 2008 | 3 | . | 11 | II |
| 1534 | Polypay | Idaho 2008 | 3 | . | 11 | .  |
| 1535 | Polypay | Idaho 2008 | 4 | . | 11 | ID |
| 1536 | Polypay | Idaho 2008 | 4 | . | 11 | II |
| 1537 | Polypay | Idaho 2008 | 4 | . | 11 | II |
| 1538 | Polypay | Idaho 2008 | 4 | . | 11 | ID |
| 1539 | Polypay | Idaho 2008 | 4 | . | 11 | II |

|      |         |            |   |   |    |    |
|------|---------|------------|---|---|----|----|
| 1540 | Polypay | Idaho 2008 | 1 | . | 11 | .  |
| 1541 | Polypay | Idaho 2008 | 4 | . | 11 | ID |
| 1542 | Polypay | Idaho 2008 | 4 | . | 11 | ID |
| 1543 | Polypay | Idaho 2008 | 4 | . | 11 | II |
| 1544 | Polypay | Idaho 2008 | 4 | . | 11 | DD |
| 1545 | Polypay | Idaho 2008 | 4 | . | 11 | II |
| 1546 | Polypay | Idaho 2008 | 4 | . | 11 | II |
| 1547 | Polypay | Idaho 2008 | 4 | . | 11 | II |
| 1548 | Polypay | Idaho 2008 | 5 | . | 11 | II |
| 1549 | Polypay | Idaho 2008 | 5 | . | 11 | II |
| 1550 | Polypay | Idaho 2008 | 5 | . | 11 | II |
| 1551 | Polypay | Idaho 2008 | 5 | . | 11 | II |
| 1552 | Polypay | Idaho 2008 | 1 | . | 11 | .  |
| 1553 | Polypay | Idaho 2008 | 1 | . | 11 | .  |
| 1554 | Polypay | Idaho 2008 | 1 | . | 11 | .  |
| 1555 | Polypay | Idaho 2008 | 1 | . | 11 | .  |
| 1556 | Polypay | Idaho 2008 | 1 | . | 11 | .  |
| 1557 | Polypay | Idaho 2008 | 1 | . | 11 | .  |
| 1558 | Polypay | Idaho 2008 | 1 | . | 11 | II |
| 1559 | Polypay | Idaho 2008 | 1 | . | 11 | II |
| 1560 | Polypay | Idaho 2008 | 1 | . | 11 | .  |
| 1561 | Polypay | Idaho 2008 | 1 | . | 11 | II |
| 1562 | Polypay | Idaho 2008 | 1 | . | 11 | .  |
| 1563 | Polypay | Idaho 2008 | 1 | . | 11 | .  |
| 1564 | Polypay | Idaho 2008 | 1 | . | 11 | .  |
| 1565 | Polypay | Idaho 2008 | 1 | . | 11 | II |
| 1566 | Polypay | Idaho 2008 | 1 | . | 11 | .  |
| 1567 | Polypay | Idaho 2008 | 1 | . | 11 | .  |
| 1568 | Polypay | Idaho 2008 | 1 | . | 11 | II |
| 1569 | Polypay | Idaho 2008 | 2 | . | 11 | II |
| 1570 | Polypay | Idaho 2008 | 1 | . | 11 | II |
| 1571 | Polypay | Idaho 2008 | 1 | . | 11 | II |
| 1572 | Polypay | Idaho 2008 | 1 | . | 11 | II |
| 1573 | Polypay | Idaho 2008 | 1 | . | 11 | DD |
| 1574 | Polypay | Idaho 2008 | 1 | . | 11 | II |
| 1575 | Polypay | Idaho 2008 | 1 | . | 11 | ID |
| 1576 | Polypay | Idaho 2008 | 1 | . | 11 | ID |
| 1577 | Polypay | Idaho 2008 | 1 | . | 11 | ID |
| 1578 | Polypay | Idaho 2008 | 2 | . | 11 | II |
| 1579 | Polypay | Idaho 2008 | 2 | . | 11 | ID |
| 1580 | Polypay | Idaho 2008 | 2 | . | 11 | II |
| 1581 | Polypay | Idaho 2008 | 2 | . | 11 | II |
| 1582 | Polypay | Idaho 2008 | 2 | . | 11 | ID |

|      |         |            |   |   |    |    |
|------|---------|------------|---|---|----|----|
| 1583 | Polypay | Idaho 2008 | 2 | . | 11 | II |
| 1584 | Polypay | Idaho 2008 | 2 | . | 11 | DD |
| 1585 | Polypay | Idaho 2008 | 1 | . | 11 | II |
| 1586 | Polypay | Idaho 2008 | 1 | . | 11 | DD |
| 1587 | Polypay | Idaho 2008 | 2 | . | 11 | ID |
| 1588 | Polypay | Idaho 2008 | 2 | . | 11 | II |
| 1589 | Polypay | Idaho 2008 | 2 | . | 11 | II |
| 1590 | Polypay | Idaho 2008 | 1 | . | 11 | ID |
| 1591 | Polypay | Idaho 2008 | 1 | . | 11 | II |
| 1592 | Polypay | Idaho 2008 | 2 | . | 11 | ID |
| 1593 | Polypay | Idaho 2008 | 1 | . | 11 | II |
| 1594 | Polypay | Idaho 2008 | 2 | . | 11 | II |
| 1595 | Polypay | Idaho 2008 | 1 | . | 11 | DD |
| 1596 | Polypay | Idaho 2008 | 1 | . | 11 | II |
| 1597 | Polypay | Idaho 2008 | 1 | . | 11 | ID |
| 1598 | Polypay | Idaho 2008 | 1 | . | 11 | .  |
| 1599 | Polypay | Idaho 2008 | 2 | . | 11 | II |
| 1600 | Polypay | Idaho 2008 | 2 | . | 11 | ID |
| 1601 | Polypay | Idaho 2008 | 2 | . | 11 | .  |
| 1602 | Polypay | Idaho 2008 | 2 | . | 11 | .  |
| 1603 | Polypay | Idaho 2008 | 1 | . | 11 | II |
| 1604 | Polypay | Idaho 2008 | 2 | . | 11 | .  |
| 1605 | Polypay | Idaho 2008 | 2 | . | 11 | .  |
| 1606 | Polypay | Idaho 2008 | 2 | . | 11 | .  |
| 1607 | Polypay | Idaho 2008 | 1 | . | 11 | ID |
| 1608 | Polypay | Idaho 2008 | 1 | . | 11 | II |
| 1609 | Polypay | Idaho 2008 | 1 | . | 11 | II |
| 1610 | Polypay | Idaho 2008 | 1 | . | 11 | ID |
| 1611 | Polypay | Idaho 2008 | 1 | . | 11 | II |
| 1612 | Polypay | Idaho 2008 | 1 | . | 11 | II |
| 1613 | Polypay | Idaho 2008 | 1 | . | 11 | ID |
| 1614 | Polypay | Idaho 2008 | 1 | . | 11 | ID |
| 1615 | Polypay | Idaho 2008 | 1 | . | 11 | II |
| 1616 | Polypay | Idaho 2008 | 1 | . | 11 | II |
| 1617 | Polypay | Idaho 2008 | 1 | . | 11 | II |
| 1618 | Polypay | Idaho 2008 | 2 | . | 11 | ID |
| 1619 | Polypay | Idaho 2008 | 1 | . | 11 | II |
| 1620 | Polypay | Idaho 2008 | 1 | . | 11 | .  |
| 1621 | Polypay | Idaho 2008 | 1 | . | 11 | II |
| 1622 | Polypay | Idaho 2008 | 1 | . | 11 | II |
| 1623 | Polypay | Idaho 2008 | 1 | . | 11 | II |
| 1624 | Polypay | Idaho 2008 | 1 | . | 11 | .  |
| 1625 | Polypay | Idaho 2008 | 1 | . | 11 | II |

|      |         |            |   |   |    |    |
|------|---------|------------|---|---|----|----|
| 1626 | Polypay | Idaho 2008 | 1 | . | 11 | .  |
| 1627 | Polypay | Idaho 2008 | 1 | . | 11 | DD |
| 1628 | Polypay | Idaho 2008 | 1 | . | 11 | II |
| 1629 | Polypay | Idaho 2008 | 1 | . | 11 | ID |
| 1630 | Polypay | Idaho 2008 | 2 | . | 11 | ID |
| 1631 | Polypay | Idaho 2008 | 2 | . | 11 | II |
| 1632 | Polypay | Idaho 2008 | 2 | . | 11 | II |
| 1633 | Polypay | Idaho 2008 | 1 | . | 11 | ID |
| 1634 | Polypay | Idaho 2008 | 1 | . | 11 | ID |
| 1635 | Polypay | Idaho 2008 | 2 | . | 11 | ID |
| 1636 | Polypay | Idaho 2008 | 2 | . | 11 | ID |
| 1637 | Polypay | Idaho 2008 | 1 | . | 11 | II |
| 1638 | Polypay | Idaho 2008 | 2 | . | 11 | II |
| 1639 | Polypay | Idaho 2008 | 1 | . | 11 | II |
| 1640 | Polypay | Idaho 2008 | 1 | . | 11 | ID |
| 1641 | Polypay | Idaho 2008 | 1 | . | 11 | ID |
| 1642 | Polypay | Idaho 2008 | 2 | . | 11 | ID |
| 1643 | Polypay | Idaho 2008 | 1 | . | 11 | DD |
| 1644 | Polypay | Idaho 2008 | 1 | . | 11 | II |
| 1645 | Polypay | Idaho 2008 | 2 | . | 11 | II |
| 1646 | Polypay | Idaho 2008 | 2 | . | 11 | II |
| 1647 | Polypay | Idaho 2008 | 2 | . | 11 | II |
| 1648 | Polypay | Idaho 2008 | 1 | . | 11 | II |
| 1649 | Polypay | Idaho 2008 | 2 | . | 11 | ID |
| 1650 | Polypay | Idaho 2008 | 1 | . | 11 | ID |
| 1651 | Polypay | Idaho 2008 | 1 | . | 11 | II |
| 1652 | Polypay | Idaho 2008 | 2 | . | 11 | II |
| 1653 | Polypay | Idaho 2008 | 1 | . | 11 | ID |
| 1654 | Polypay | Idaho 2008 | 1 | . | 11 | II |
| 1655 | Polypay | Idaho 2008 | 2 | . | 11 | II |
| 1656 | Polypay | Idaho 2008 | 2 | . | 11 | II |
| 1657 | Polypay | Idaho 2008 | 1 | . | 11 | ID |
| 1658 | Polypay | Idaho 2008 | 1 | . | 11 | ID |
| 1659 | Polypay | Idaho 2008 | 2 | . | 11 | II |
| 1660 | Polypay | Idaho 2008 | 2 | . | 11 | II |
| 1661 | Polypay | Idaho 2008 | 1 | . | 11 | II |
| 1662 | Polypay | Idaho 2008 | 2 | . | 11 | II |
| 1663 | Polypay | Idaho 2008 | 2 | . | 11 | II |
| 1664 | Polypay | Idaho 2008 | 2 | . | 11 | ID |
| 1665 | Polypay | Idaho 2008 | 2 | . | 11 | ID |
| 1666 | Polypay | Idaho 2008 | 1 | . | 11 | II |
| 1667 | Polypay | Idaho 2008 | 1 | . | 12 | II |
| 1668 | Polypay | Idaho 2008 | 1 | . | 12 | ID |

|      |         |            |   |       |    |    |
|------|---------|------------|---|-------|----|----|
| 1669 | Polypay | Idaho 2008 | 1 | .     | 13 | ID |
| 1670 | Polypay | Idaho 2008 | 1 | .     | 13 | II |
| 1671 | Polypay | Idaho 2008 | 1 | .     | 13 | II |
| 1672 | Polypay | Idaho 2008 | 1 | .     | 13 | ID |
| 1673 | Polypay | Idaho 2008 | 4 | .     | 13 | ID |
| 1674 | Polypay | Idaho 2008 | 1 | .     | 13 | II |
| 1675 | Polypay | Idaho 2008 | 1 | .     | 13 | DD |
| 1676 | Polypay | Idaho 2008 | 1 | .     | 13 | ID |
| 1677 | Polypay | Idaho 2008 | 1 | .     | 14 | II |
| 1678 | Polypay | Idaho 2008 | 2 | 10.8  | 11 | ID |
| 1679 | Polypay | Idaho 2008 | 4 | 10.9  | 13 | .  |
| 1680 | Polypay | Idaho 2008 | 3 | 1010  | 13 | II |
| 1681 | Polypay | Idaho 2008 | 1 | 102   | 13 | II |
| 1682 | Polypay | Idaho 2008 | 5 | 103   | 11 | ID |
| 1683 | Polypay | Idaho 2008 | 3 | 105   | 33 | II |
| 1684 | Polypay | Idaho 2008 | 4 | 105   | 33 | .  |
| 1685 | Polypay | Idaho 2008 | 4 | 1050  | 11 | .  |
| 1686 | Polypay | Idaho 2008 | 4 | 1080  | 11 | .  |
| 1687 | Polypay | Idaho 2008 | 5 | 11.2  | 11 | II |
| 1688 | Polypay | Idaho 2008 | 2 | 118   | 11 | II |
| 1689 | Polypay | Idaho 2008 | 4 | 12.3  | 11 | ID |
| 1690 | Polypay | Idaho 2008 | 2 | 121   | 11 | .  |
| 1691 | Polypay | Idaho 2008 | 4 | 124   | 11 | II |
| 1692 | Polypay | Idaho 2008 | 2 | 127   | 11 | II |
| 1693 | Polypay | Idaho 2008 | 4 | 13    | 11 | II |
| 1694 | Polypay | Idaho 2008 | 4 | 132   | 13 | DD |
| 1695 | Polypay | Idaho 2008 | 4 | 13300 | 11 | .  |
| 1696 | Polypay | Idaho 2008 | 1 | 134   | 13 | ID |
| 1697 | Polypay | Idaho 2008 | 4 | 135   | 11 | II |
| 1698 | Polypay | Idaho 2008 | 4 | 136   | 11 | II |
| 1699 | Polypay | Idaho 2008 | 3 | 139   | 11 | II |
| 1700 | Polypay | Idaho 2008 | 5 | 14.2  | 11 | .  |
| 1701 | Polypay | Idaho 2008 | 3 | 14.9  | 13 | .  |
| 1702 | Polypay | Idaho 2008 | 2 | 140   | 11 | DD |
| 1703 | Polypay | Idaho 2008 | 4 | 150   | 11 | II |
| 1704 | Polypay | Idaho 2008 | 3 | 151   | 11 | ID |
| 1705 | Polypay | Idaho 2008 | 1 | 153   | 13 | ID |
| 1706 | Polypay | Idaho 2008 | 4 | 155   | 11 | ID |
| 1707 | Polypay | Idaho 2008 | 4 | 156   | 11 | ID |
| 1708 | Polypay | Idaho 2008 | 2 | 16.6  | 11 | .  |
| 1709 | Polypay | Idaho 2008 | 2 | 16.6  | 13 | II |
| 1710 | Polypay | Idaho 2008 | 2 | 16.8  | 11 | II |
| 1711 | Polypay | Idaho 2008 | 2 | 163   | 13 | ID |



|      |         |            |   |       |    |    |
|------|---------|------------|---|-------|----|----|
| 1712 | Polypay | Idaho 2008 | 3 | 1670  | 11 | II |
| 1713 | Polypay | Idaho 2008 | 2 | 169   | 11 | ID |
| 1714 | Polypay | Idaho 2008 | 4 | 16900 | 11 | II |
| 1715 | Polypay | Idaho 2008 | 4 | 16900 | 11 | ID |
| 1716 | Polypay | Idaho 2008 | 1 | 171   | 11 | ID |
| 1717 | Polypay | Idaho 2008 | 3 | 17200 | 11 | II |
| 1718 | Polypay | Idaho 2008 | 4 | 1740  | 11 | II |
| 1719 | Polypay | Idaho 2008 | 2 | 1750  | 11 | II |
| 1720 | Polypay | Idaho 2008 | 4 | 176   | 11 | .  |
| 1721 | Polypay | Idaho 2008 | 3 | 177   | 11 | ID |
| 1722 | Polypay | Idaho 2008 | 2 | 181   | 11 | ID |
| 1723 | Polypay | Idaho 2008 | 4 | 181   | 11 | II |
| 1724 | Polypay | Idaho 2008 | 4 | 182   | 11 | .  |
| 1725 | Polypay | Idaho 2008 | 4 | 184   | 11 | ID |
| 1726 | Polypay | Idaho 2008 | 4 | 188   | 11 | II |
| 1727 | Polypay | Idaho 2008 | 5 | 1880  | 11 | ID |
| 1728 | Polypay | Idaho 2008 | 2 | 189   | 13 | II |
| 1729 | Polypay | Idaho 2008 | 3 | 191   | 11 | II |
| 1730 | Polypay | Idaho 2008 | 2 | 192   | 11 | II |
| 1731 | Polypay | Idaho 2008 | 2 | 2.06  | 11 | ID |
| 1732 | Polypay | Idaho 2008 | 1 | 2.28  | 11 | II |
| 1733 | Polypay | Idaho 2008 | 3 | 20.3  | 11 | II |
| 1734 | Polypay | Idaho 2008 | 4 | 20.3  | 11 | II |
| 1735 | Polypay | Idaho 2008 | 4 | 2070  | 11 | ID |
| 1736 | Polypay | Idaho 2008 | 3 | 21.9  | 11 | II |
| 1737 | Polypay | Idaho 2008 | 5 | 21000 | 11 | II |
| 1738 | Polypay | Idaho 2008 | 3 | 2120  | 11 | ID |
| 1739 | Polypay | Idaho 2008 | 2 | 216   | 11 | .  |
| 1740 | Polypay | Idaho 2008 | 1 | 226   | 11 | II |
| 1741 | Polypay | Idaho 2008 | 4 | 23    | 11 | ID |
| 1742 | Polypay | Idaho 2008 | 4 | 23.9  | 11 | ID |
| 1743 | Polypay | Idaho 2008 | 1 | 236   | 11 | II |
| 1744 | Polypay | Idaho 2008 | 5 | 23800 | 11 | .  |
| 1745 | Polypay | Idaho 2008 | 2 | 240   | 13 | II |
| 1746 | Polypay | Idaho 2008 | 2 | 2410  | 11 | ID |
| 1747 | Polypay | Idaho 2008 | 3 | 244   | 11 | ID |
| 1748 | Polypay | Idaho 2008 | 3 | 25.1  | 11 | ID |
| 1749 | Polypay | Idaho 2008 | 3 | 2510  | 11 | II |
| 1750 | Polypay | Idaho 2008 | 4 | 253   | 11 | II |
| 1751 | Polypay | Idaho 2008 | 2 | 266   | 11 | .  |
| 1752 | Polypay | Idaho 2008 | 4 | 270   | 11 | II |
| 1753 | Polypay | Idaho 2008 | 3 | 28.1  | 11 | II |
| 1754 | Polypay | Idaho 2008 | 1 | 2800  | 11 | II |

|      |         |            |   |      |    |    |
|------|---------|------------|---|------|----|----|
| 1755 | Polypay | Idaho 2008 | 3 | 287  | 11 | .  |
| 1756 | Polypay | Idaho 2008 | 4 | 293  | 11 | II |
| 1757 | Polypay | Idaho 2008 | 2 | 2930 | 11 | II |
| 1758 | Polypay | Idaho 2008 | 2 | 3.19 | 11 | II |
| 1759 | Polypay | Idaho 2008 | 1 | 3.21 | 11 | ID |
| 1760 | Polypay | Idaho 2008 | 4 | 3.37 | 13 | ID |
| 1761 | Polypay | Idaho 2008 | 3 | 30.7 | 11 | II |
| 1762 | Polypay | Idaho 2008 | 1 | 3120 | 11 | II |
| 1763 | Polypay | Idaho 2008 | 2 | 3140 | 11 | ID |
| 1764 | Polypay | Idaho 2008 | 3 | 33   | 11 | .  |
| 1765 | Polypay | Idaho 2008 | 2 | 3350 | 11 | II |
| 1766 | Polypay | Idaho 2008 | 2 | 337  | 11 | II |
| 1767 | Polypay | Idaho 2008 | 4 | 35.2 | 11 | .  |
| 1768 | Polypay | Idaho 2008 | 1 | 36.9 | 11 | .  |
| 1769 | Polypay | Idaho 2008 | 1 | 3600 | 11 | ID |
| 1770 | Polypay | Idaho 2008 | 4 | 3690 | 11 | II |
| 1771 | Polypay | Idaho 2008 | 5 | 379  | 11 | II |
| 1772 | Polypay | Idaho 2008 | 5 | 396  | 11 | II |
| 1773 | Polypay | Idaho 2008 | 3 | 398  | 11 | II |
| 1774 | Polypay | Idaho 2008 | 2 | 4.41 | 11 | ID |
| 1775 | Polypay | Idaho 2008 | 2 | 4.56 | 11 | II |
| 1776 | Polypay | Idaho 2008 | 2 | 409  | 13 | DD |
| 1777 | Polypay | Idaho 2008 | 3 | 4170 | 11 | DD |
| 1778 | Polypay | Idaho 2008 | 5 | 436  | 11 | II |
| 1779 | Polypay | Idaho 2008 | 2 | 44.3 | 11 | ID |
| 1780 | Polypay | Idaho 2008 | 3 | 45.3 | 11 | II |
| 1781 | Polypay | Idaho 2008 | 4 | 456  | 11 | II |
| 1782 | Polypay | Idaho 2008 | 2 | 4850 | 11 | II |
| 1783 | Polypay | Idaho 2008 | 2 | 5.39 | 13 | II |
| 1784 | Polypay | Idaho 2008 | 2 | 5.61 | 11 | .  |
| 1785 | Polypay | Idaho 2008 | 2 | 50.1 | 11 | II |
| 1786 | Polypay | Idaho 2008 | 5 | 54.2 | 11 | .  |
| 1787 | Polypay | Idaho 2008 | 2 | 541  | 13 | .  |
| 1788 | Polypay | Idaho 2008 | 1 | 55.4 | 11 | ID |
| 1789 | Polypay | Idaho 2008 | 2 | 55.6 | 12 | II |
| 1790 | Polypay | Idaho 2008 | 4 | 5670 | 11 | II |
| 1791 | Polypay | Idaho 2008 | 4 | 58.9 | 11 | II |
| 1792 | Polypay | Idaho 2008 | 4 | 59.1 | 11 | DD |
| 1793 | Polypay | Idaho 2008 | 1 | 5900 | 14 | ID |
| 1794 | Polypay | Idaho 2008 | 2 | 6.19 | 13 | DD |
| 1795 | Polypay | Idaho 2008 | 4 | 606  | 11 | ID |
| 1796 | Polypay | Idaho 2008 | 1 | 61.1 | 11 | ID |
| 1797 | Polypay | Idaho 2008 | 3 | 630  | 11 | .  |

|      |             |            |   |      |    |    |
|------|-------------|------------|---|------|----|----|
| 1798 | Polypay     | Idaho 2008 | 3 | 652  | 11 | II |
| 1799 | Polypay     | Idaho 2008 | 3 | 672  | 11 | ID |
| 1800 | Polypay     | Idaho 2008 | 4 | 69.9 | 11 | ID |
| 1801 | Polypay     | Idaho 2008 | 5 | 7.09 | 11 | II |
| 1802 | Polypay     | Idaho 2008 | 4 | 7.4  | 11 | II |
| 1803 | Polypay     | Idaho 2008 | 4 | 7.51 | 11 | II |
| 1804 | Polypay     | Idaho 2008 | 4 | 7.91 | 13 | DD |
| 1805 | Polypay     | Idaho 2008 | 1 | 7.99 | 11 | II |
| 1806 | Polypay     | Idaho 2008 | 2 | 7110 | 13 | ID |
| 1807 | Polypay     | Idaho 2008 | 2 | 75.7 | 11 | ID |
| 1808 | Polypay     | Idaho 2008 | 3 | 77.2 | 11 | ID |
| 1809 | Polypay     | Idaho 2008 | 3 | 78.1 | 11 | .  |
| 1810 | Polypay     | Idaho 2008 | 5 | 785  | 11 | ID |
| 1811 | Polypay     | Idaho 2008 | 2 | 8.44 | 13 | ID |
| 1812 | Polypay     | Idaho 2008 | 3 | 80.2 | 11 | .  |
| 1813 | Polypay     | Idaho 2008 | 2 | 81   | 11 | II |
| 1814 | Polypay     | Idaho 2008 | 1 | 829  | 11 | II |
| 1815 | Polypay     | Idaho 2008 | 1 | 86.4 | 12 | ID |
| 1816 | Polypay     | Idaho 2008 | 2 | 87.2 | 11 | II |
| 1817 | Polypay     | Idaho 2008 | 2 | 87.5 | 11 | II |
| 1818 | Polypay     | Idaho 2008 | 3 | 88.1 | 11 | II |
| 1819 | Polypay     | Idaho 2008 | 3 | 891  | 11 | ID |
| 1820 | Polypay     | Idaho 2008 | 1 | 9.35 | 11 | .  |
| 1821 | Polypay     | Idaho 2008 | 1 | 91   | 11 | .  |
| 1822 | Polypay     | Idaho 2008 | 3 | 981  | 11 | ID |
| 1823 | Polypay     | Idaho 2008 | 3 | 99.8 | 11 | ID |
| 1824 | Polypay     | Idaho 2008 | 1 | .    | 11 | ID |
| 1825 | Polypay     | Idaho 2008 | 5 | .    | 11 | DD |
| 1826 | Polypay     | Idaho 2008 | 1 | .    | 11 | DD |
| 1827 | Polypay     | Idaho 2008 | 1 | .    | 11 | II |
| 1828 | Rambouillet | Idaho 2008 | 2 | .    | 11 | II |
| 1829 | Rambouillet | Idaho 2008 | 3 | .    | 11 | II |
| 1830 | Rambouillet | Idaho 2008 | 1 | .    | 11 | II |
| 1831 | Rambouillet | Idaho 2008 | 2 | .    | 11 | .  |
| 1832 | Rambouillet | Idaho 2008 | 1 | .    | 11 | ID |
| 1833 | Rambouillet | Idaho 2008 | 1 | .    | 11 | II |
| 1834 | Rambouillet | Idaho 2008 | 2 | .    | 11 | II |
| 1835 | Rambouillet | Idaho 2008 | 1 | .    | 11 | DD |
| 1836 | Rambouillet | Idaho 2008 | 1 | .    | 11 | ID |
| 1837 | Rambouillet | Idaho 2008 | 1 | .    | 11 | .  |
| 1838 | Rambouillet | Idaho 2008 | 3 | .    | 11 | DD |
| 1839 | Rambouillet | Idaho 2008 | 4 | .    | 11 | ID |
| 1840 | Rambouillet | Idaho 2008 | 4 | .    | 11 | II |

|      |             |            |   |   |    |    |
|------|-------------|------------|---|---|----|----|
| 1841 | Rambouillet | Idaho 2008 | 1 | . | 11 | II |
| 1842 | Rambouillet | Idaho 2008 | 4 | . | 11 | II |
| 1843 | Rambouillet | Idaho 2008 | 1 | . | 11 | ID |
| 1844 | Rambouillet | Idaho 2008 | 2 | . | 11 | II |
| 1845 | Rambouillet | Idaho 2008 | 3 | . | 11 | .  |
| 1846 | Rambouillet | Idaho 2008 | 1 | . | 14 | ID |
| 1847 | Rambouillet | Idaho 2008 | 4 | . | 11 | .  |
| 1848 | Rambouillet | Idaho 2008 | 4 | . | 11 | II |
| 1849 | Rambouillet | Idaho 2008 | 4 | . | 11 | II |
| 1850 | Rambouillet | Idaho 2008 | 4 | . | 11 | II |
| 1851 | Rambouillet | Idaho 2008 | 3 | . | 11 | ID |
| 1852 | Rambouillet | Idaho 2008 | 3 | . | 11 | II |
| 1853 | Rambouillet | Idaho 2008 | 3 | . | 11 | ID |
| 1854 | Rambouillet | Idaho 2008 | 3 | . | 11 | ID |
| 1855 | Rambouillet | Idaho 2008 | 3 | . | 11 | ID |
| 1856 | Rambouillet | Idaho 2008 | 4 | . | 11 | ID |
| 1857 | Rambouillet | Idaho 2008 | 1 | . | 11 | II |
| 1858 | Rambouillet | Idaho 2008 | 1 | . | 11 | ID |
| 1859 | Rambouillet | Idaho 2008 | 1 | . | 11 | II |
| 1860 | Rambouillet | Idaho 2008 | 1 | . | 11 | II |
| 1861 | Rambouillet | Idaho 2008 | 1 | . | 11 | ID |
| 1862 | Rambouillet | Idaho 2008 | 1 | . | 11 | II |
| 1863 | Rambouillet | Idaho 2008 | 1 | . | 11 | II |
| 1864 | Rambouillet | Idaho 2008 | 1 | . | 11 | ID |
| 1865 | Rambouillet | Idaho 2008 | 1 | . | 11 | ID |
| 1866 | Rambouillet | Idaho 2008 | 1 | . | 11 | ID |
| 1867 | Rambouillet | Idaho 2008 | 1 | . | 11 | ID |
| 1868 | Rambouillet | Idaho 2008 | 1 | . | 11 | II |
| 1869 | Rambouillet | Idaho 2008 | 1 | . | 11 | ID |
| 1870 | Rambouillet | Idaho 2008 | 1 | . | 11 | II |
| 1871 | Rambouillet | Idaho 2008 | 1 | . | 11 | II |
| 1872 | Rambouillet | Idaho 2008 | 1 | . | 11 | II |
| 1873 | Rambouillet | Idaho 2008 | 1 | . | 11 | ID |
| 1874 | Rambouillet | Idaho 2008 | 1 | . | 11 | II |
| 1875 | Rambouillet | Idaho 2008 | 1 | . | 11 | II |
| 1876 | Rambouillet | Idaho 2008 | 1 | . | 11 | ID |
| 1877 | Rambouillet | Idaho 2008 | 1 | . | 11 | II |
| 1878 | Rambouillet | Idaho 2008 | 1 | . | 11 | .  |
| 1879 | Rambouillet | Idaho 2008 | 1 | . | 11 | .  |
| 1880 | Rambouillet | Idaho 2008 | 1 | . | 11 | .  |
| 1881 | Rambouillet | Idaho 2008 | 1 | . | 11 | .  |
| 1882 | Rambouillet | Idaho 2008 | 1 | . | 11 | II |
| 1883 | Rambouillet | Idaho 2008 | 1 | . | 11 | .  |

|      |             |            |   |   |    |    |
|------|-------------|------------|---|---|----|----|
| 1884 | Rambouillet | Idaho 2008 | 3 | . | 11 | ID |
| 1885 | Rambouillet | Idaho 2008 | 2 | . | 11 | II |
| 1886 | Rambouillet | Idaho 2008 | 4 | . | 11 | II |
| 1887 | Rambouillet | Idaho 2008 | 1 | . | 11 | II |
| 1888 | Rambouillet | Idaho 2008 | 1 | . | 11 | II |
| 1889 | Rambouillet | Idaho 2008 | 1 | . | 11 | II |
| 1890 | Rambouillet | Idaho 2008 | 1 | . | 11 | II |
| 1891 | Rambouillet | Idaho 2008 | 1 | . | 11 | DD |
| 1892 | Rambouillet | Idaho 2008 | 1 | . | 11 | ID |
| 1893 | Rambouillet | Idaho 2008 | 1 | . | 11 | II |
| 1894 | Rambouillet | Idaho 2008 | 1 | . | 11 | ID |
| 1895 | Rambouillet | Idaho 2008 | 1 | . | 11 | II |
| 1896 | Rambouillet | Idaho 2008 | 5 | . | 11 | II |
| 1897 | Rambouillet | Idaho 2008 | 1 | . | 11 | II |
| 1898 | Rambouillet | Idaho 2008 | 5 | . | 11 | II |
| 1899 | Rambouillet | Idaho 2008 | 1 | . | 11 | ID |
| 1900 | Rambouillet | Idaho 2008 | 1 | . | 11 | II |
| 1901 | Rambouillet | Idaho 2008 | 1 | . | 11 | II |
| 1902 | Rambouillet | Idaho 2008 | 1 | . | 11 | ID |
| 1903 | Rambouillet | Idaho 2008 | 1 | . | 11 | II |
| 1904 | Rambouillet | Idaho 2008 | 3 | . | 11 | II |
| 1905 | Rambouillet | Idaho 2008 | 4 | . | 11 | ID |
| 1906 | Rambouillet | Idaho 2008 | 4 | . | 11 | ID |
| 1907 | Rambouillet | Idaho 2008 | 4 | . | 11 | ID |
| 1908 | Rambouillet | Idaho 2008 | 1 | . | 11 | II |
| 1909 | Rambouillet | Idaho 2008 | 4 | . | 11 | DD |
| 1910 | Rambouillet | Idaho 2008 | 4 | . | 11 | II |
| 1911 | Rambouillet | Idaho 2008 | 1 | . | 11 | II |
| 1912 | Rambouillet | Idaho 2008 | 4 | . | 11 | ID |
| 1913 | Rambouillet | Idaho 2008 | 4 | . | 11 | II |
| 1914 | Rambouillet | Idaho 2008 | 4 | . | 11 | ID |
| 1915 | Rambouillet | Idaho 2008 | 4 | . | 11 | II |
| 1916 | Rambouillet | Idaho 2008 | 4 | . | 11 | II |
| 1917 | Rambouillet | Idaho 2008 | 4 | . | 11 | II |
| 1918 | Rambouillet | Idaho 2008 | 4 | . | 11 | II |
| 1919 | Rambouillet | Idaho 2008 | 4 | . | 11 | ID |
| 1920 | Rambouillet | Idaho 2008 | 4 | . | 11 | ID |
| 1921 | Rambouillet | Idaho 2008 | 4 | . | 11 | ID |
| 1922 | Rambouillet | Idaho 2008 | 4 | . | 11 | ID |
| 1923 | Rambouillet | Idaho 2008 | 4 | . | 11 | ID |
| 1924 | Rambouillet | Idaho 2008 | 1 | . | 11 | II |
| 1925 | Rambouillet | Idaho 2008 | 4 | . | 11 | ID |
| 1926 | Rambouillet | Idaho 2008 | 4 | . | 11 | II |

|      |             |            |   |   |    |    |
|------|-------------|------------|---|---|----|----|
| 1927 | Rambouillet | Idaho 2008 | 1 | . | 11 | II |
| 1928 | Rambouillet | Idaho 2008 | 1 | . | 11 | DD |
| 1929 | Rambouillet | Idaho 2008 | 1 | . | 11 | II |
| 1930 | Rambouillet | Idaho 2008 | 1 | . | 11 | ID |
| 1931 | Rambouillet | Idaho 2008 | 1 | . | 11 | ID |
| 1932 | Rambouillet | Idaho 2008 | 4 | . | 11 | ID |
| 1933 | Rambouillet | Idaho 2008 | 4 | . | 11 | ID |
| 1934 | Rambouillet | Idaho 2008 | 4 | . | 11 | II |
| 1935 | Rambouillet | Idaho 2008 | 1 | . | 11 | ID |
| 1936 | Rambouillet | Idaho 2008 | 1 | . | 11 | ID |
| 1937 | Rambouillet | Idaho 2008 | 1 | . | 11 | II |
| 1938 | Rambouillet | Idaho 2008 | 1 | . | 11 | ID |
| 1939 | Rambouillet | Idaho 2008 | 4 | . | 11 | II |
| 1940 | Rambouillet | Idaho 2008 | 1 | . | 11 | II |
| 1941 | Rambouillet | Idaho 2008 | 1 | . | 11 | ID |
| 1942 | Rambouillet | Idaho 2008 | 1 | . | 11 | ID |
| 1943 | Rambouillet | Idaho 2008 | 1 | . | 11 | II |
| 1944 | Rambouillet | Idaho 2008 | 4 | . | 11 | ID |
| 1945 | Rambouillet | Idaho 2008 | 1 | . | 11 | DD |
| 1946 | Rambouillet | Idaho 2008 | 4 | . | 11 | DD |
| 1947 | Rambouillet | Idaho 2008 | 1 | . | 11 | ID |
| 1948 | Rambouillet | Idaho 2008 | 4 | . | 11 | ID |
| 1949 | Rambouillet | Idaho 2008 | 4 | . | 11 | II |
| 1950 | Rambouillet | Idaho 2008 | 4 | . | 11 | II |
| 1951 | Rambouillet | Idaho 2008 | 4 | . | 11 | II |
| 1952 | Rambouillet | Idaho 2008 | 1 | . | 11 | DD |
| 1953 | Rambouillet | Idaho 2008 | 1 | . | 11 | II |
| 1954 | Rambouillet | Idaho 2008 | 4 | . | 11 | ID |
| 1955 | Rambouillet | Idaho 2008 | 4 | . | 11 | II |
| 1956 | Rambouillet | Idaho 2008 | 4 | . | 11 | II |
| 1957 | Rambouillet | Idaho 2008 | 2 | . | 11 | II |
| 1958 | Rambouillet | Idaho 2008 | 2 | . | 11 | II |
| 1959 | Rambouillet | Idaho 2008 | 2 | . | 11 | II |
| 1960 | Rambouillet | Idaho 2008 | 2 | . | 11 | II |
| 1961 | Rambouillet | Idaho 2008 | 2 | . | 11 | ID |
| 1962 | Rambouillet | Idaho 2008 | 2 | . | 11 | DD |
| 1963 | Rambouillet | Idaho 2008 | 2 | . | 11 | II |
| 1964 | Rambouillet | Idaho 2008 | 2 | . | 11 | ID |
| 1965 | Rambouillet | Idaho 2008 | 2 | . | 11 | II |
| 1966 | Rambouillet | Idaho 2008 | 2 | . | 11 | ID |
| 1967 | Rambouillet | Idaho 2008 | 2 | . | 11 | II |
| 1968 | Rambouillet | Idaho 2008 | 2 | . | 11 | II |
| 1969 | Rambouillet | Idaho 2008 | 2 | . | 11 | ID |

|      |             |            |   |   |    |    |
|------|-------------|------------|---|---|----|----|
| 1970 | Rambouillet | Idaho 2008 | 2 | . | 11 | II |
| 1971 | Rambouillet | Idaho 2008 | 2 | . | 11 | ID |
| 1972 | Rambouillet | Idaho 2008 | 2 | . | 11 | II |
| 1973 | Rambouillet | Idaho 2008 | 2 | . | 11 | II |
| 1974 | Rambouillet | Idaho 2008 | 2 | . | 11 | II |
| 1975 | Rambouillet | Idaho 2008 | 2 | . | 11 | II |
| 1976 | Rambouillet | Idaho 2008 | 2 | . | 11 | ID |
| 1977 | Rambouillet | Idaho 2008 | 2 | . | 11 | ID |
| 1978 | Rambouillet | Idaho 2008 | 2 | . | 11 | ID |
| 1979 | Rambouillet | Idaho 2008 | 2 | . | 11 | ID |
| 1980 | Rambouillet | Idaho 2008 | 2 | . | 11 | II |
| 1981 | Rambouillet | Idaho 2008 | 2 | . | 11 | II |
| 1982 | Rambouillet | Idaho 2008 | 2 | . | 11 | II |
| 1983 | Rambouillet | Idaho 2008 | 2 | . | 11 | II |
| 1984 | Rambouillet | Idaho 2008 | 2 | . | 11 | II |
| 1985 | Rambouillet | Idaho 2008 | 2 | . | 11 | ID |
| 1986 | Rambouillet | Idaho 2008 | 2 | . | 11 | II |
| 1987 | Rambouillet | Idaho 2008 | 2 | . | 11 | ID |
| 1988 | Rambouillet | Idaho 2008 | 2 | . | 11 | II |
| 1989 | Rambouillet | Idaho 2008 | 2 | . | 11 | ID |
| 1990 | Rambouillet | Idaho 2008 | 3 | . | 11 | II |
| 1991 | Rambouillet | Idaho 2008 | 2 | . | 11 | II |
| 1992 | Rambouillet | Idaho 2008 | 2 | . | 11 | ID |
| 1993 | Rambouillet | Idaho 2008 | 2 | . | 11 | .  |
| 1994 | Rambouillet | Idaho 2008 | 2 | . | 11 | .  |
| 1995 | Rambouillet | Idaho 2008 | 2 | . | 11 | ID |
| 1996 | Rambouillet | Idaho 2008 | 2 | . | 11 | .  |
| 1997 | Rambouillet | Idaho 2008 | 2 | . | 11 | ID |
| 1998 | Rambouillet | Idaho 2008 | 2 | . | 11 | II |
| 1999 | Rambouillet | Idaho 2008 | 2 | . | 11 | ID |
| 2000 | Rambouillet | Idaho 2008 | 2 | . | 11 | II |
| 2001 | Rambouillet | Idaho 2008 | 2 | . | 11 | II |
| 2002 | Rambouillet | Idaho 2008 | 2 | . | 11 | II |
| 2003 | Rambouillet | Idaho 2008 | 2 | . | 11 | II |
| 2004 | Rambouillet | Idaho 2008 | 2 | . | 11 | .  |
| 2005 | Rambouillet | Idaho 2008 | 2 | . | 11 | II |
| 2006 | Rambouillet | Idaho 2008 | 2 | . | 11 | II |
| 2007 | Rambouillet | Idaho 2008 | 2 | . | 11 | II |
| 2008 | Rambouillet | Idaho 2008 | 2 | . | 11 | II |
| 2009 | Rambouillet | Idaho 2008 | 2 | . | 11 | II |
| 2010 | Rambouillet | Idaho 2008 | 2 | . | 11 | II |
| 2011 | Rambouillet | Idaho 2008 | 2 | . | 11 | ID |
| 2012 | Rambouillet | Idaho 2008 | 2 | . | 11 | ID |

|      |             |            |   |   |    |    |
|------|-------------|------------|---|---|----|----|
| 2013 | Rambouillet | Idaho 2008 | 2 | . | 11 | .  |
| 2014 | Rambouillet | Idaho 2008 | 2 | . | 11 | DD |
| 2015 | Rambouillet | Idaho 2008 | 2 | . | 11 | ID |
| 2016 | Rambouillet | Idaho 2008 | 2 | . | 11 | II |
| 2017 | Rambouillet | Idaho 2008 | 2 | . | 11 | II |
| 2018 | Rambouillet | Idaho 2008 | 2 | . | 11 | II |
| 2019 | Rambouillet | Idaho 2008 | 2 | . | 11 | II |
| 2020 | Rambouillet | Idaho 2008 | 2 | . | 11 | II |
| 2021 | Rambouillet | Idaho 2008 | 2 | . | 11 | DD |
| 2022 | Rambouillet | Idaho 2008 | 2 | . | 11 | .  |
| 2023 | Rambouillet | Idaho 2008 | 2 | . | 11 | II |
| 2024 | Rambouillet | Idaho 2008 | 2 | . | 11 | II |
| 2025 | Rambouillet | Idaho 2008 | 2 | . | 11 | II |
| 2026 | Rambouillet | Idaho 2008 | 3 | . | 11 | II |
| 2027 | Rambouillet | Idaho 2008 | 3 | . | 11 | II |
| 2028 | Rambouillet | Idaho 2008 | 3 | . | 11 | II |
| 2029 | Rambouillet | Idaho 2008 | 3 | . | 11 | ID |
| 2030 | Rambouillet | Idaho 2008 | 3 | . | 11 | II |
| 2031 | Rambouillet | Idaho 2008 | 3 | . | 11 | II |
| 2032 | Rambouillet | Idaho 2008 | 3 | . | 11 | ID |
| 2033 | Rambouillet | Idaho 2008 | 3 | . | 11 | ID |
| 2034 | Rambouillet | Idaho 2008 | 3 | . | 11 | ID |
| 2035 | Rambouillet | Idaho 2008 | 3 | . | 11 | ID |
| 2036 | Rambouillet | Idaho 2008 | 3 | . | 11 | ID |
| 2037 | Rambouillet | Idaho 2008 | 3 | . | 11 | ID |
| 2038 | Rambouillet | Idaho 2008 | 3 | . | 11 | ID |
| 2039 | Rambouillet | Idaho 2008 | 3 | . | 11 | .  |
| 2040 | Rambouillet | Idaho 2008 | 3 | . | 11 | ID |
| 2041 | Rambouillet | Idaho 2008 | 3 | . | 11 | ID |
| 2042 | Rambouillet | Idaho 2008 | 3 | . | 11 | ID |
| 2043 | Rambouillet | Idaho 2008 | 3 | . | 11 | II |
| 2044 | Rambouillet | Idaho 2008 | 3 | . | 11 | II |
| 2045 | Rambouillet | Idaho 2008 | 3 | . | 11 | ID |
| 2046 | Rambouillet | Idaho 2008 | 3 | . | 11 | II |
| 2047 | Rambouillet | Idaho 2008 | 3 | . | 11 | ID |
| 2048 | Rambouillet | Idaho 2008 | 3 | . | 11 | II |
| 2049 | Rambouillet | Idaho 2008 | 3 | . | 11 | II |
| 2050 | Rambouillet | Idaho 2008 | 3 | . | 11 | ID |
| 2051 | Rambouillet | Idaho 2008 | 3 | . | 11 | II |
| 2052 | Rambouillet | Idaho 2008 | 3 | . | 11 | ID |
| 2053 | Rambouillet | Idaho 2008 | 3 | . | 11 | ID |
| 2054 | Rambouillet | Idaho 2008 | 3 | . | 11 | ID |
| 2055 | Rambouillet | Idaho 2008 | 3 | . | 11 | II |



|      |             |            |   |      |     |    |
|------|-------------|------------|---|------|-----|----|
| 2056 | Rambouillet | Idaho 2008 | 3 | .    | 11  | II |
| 2057 | Rambouillet | Idaho 2008 | 3 | .    | 11  | II |
| 2058 | Rambouillet | Idaho 2008 | 3 | .    | 11  | II |
| 2059 | Rambouillet | Idaho 2008 | 3 | .    | 11  | DD |
| 2060 | Rambouillet | Idaho 2008 | 3 | .    | 11  | DD |
| 2061 | Rambouillet | Idaho 2008 | 3 | .    | 11  | DD |
| 2062 | Rambouillet | Idaho 2008 | 3 | .    | 11  | II |
| 2063 | Rambouillet | Idaho 2008 | 3 | .    | 11  | ID |
| 2064 | Rambouillet | Idaho 2008 | 3 | .    | 11  | DD |
| 2065 | Rambouillet | Idaho 2008 | 3 | .    | 11  | ID |
| 2066 | Rambouillet | Idaho 2008 | 3 | .    | 11  | ID |
| 2067 | Rambouillet | Idaho 2008 | 3 | .    | 11  | DD |
| 2068 | Rambouillet | Idaho 2008 | 3 | .    | 14  | ID |
| 2069 | Rambouillet | Idaho 2008 | 3 | .    | 14  | ID |
| 2070 | Rambouillet | Idaho 2008 | 1 | .    | 14  | II |
| 2071 | Rambouillet | Idaho 2008 | 4 | .    | 110 | II |
| 2072 | Rambouillet | Idaho 2008 | 4 | .    | 110 | ID |
| 2073 | Rambouillet | Idaho 2008 | 2 | 1.01 | 11  | II |
| 2074 | Rambouillet | Idaho 2008 | 4 | 1.05 | 11  | ID |
| 2075 | Rambouillet | Idaho 2008 | 2 | 1.05 | 11  | ID |
| 2076 | Rambouillet | Idaho 2008 | 1 | 1.17 | 11  | ID |
| 2077 | Rambouillet | Idaho 2008 | 1 | 1.25 | 11  | II |
| 2078 | Rambouillet | Idaho 2008 | 1 | 1.65 | 11  | II |
| 2079 | Rambouillet | Idaho 2008 | 4 | 10.2 | 11  | II |
| 2080 | Rambouillet | Idaho 2008 | 2 | 10.3 | 11  | II |
| 2081 | Rambouillet | Idaho 2008 | 2 | 10.4 | 13  | II |
| 2082 | Rambouillet | Idaho 2008 | 2 | 10.9 | 11  | II |
| 2083 | Rambouillet | Idaho 2008 | 4 | 102  | 11  | ID |
| 2084 | Rambouillet | Idaho 2008 | 4 | 1030 | 11  | II |
| 2085 | Rambouillet | Idaho 2008 | 2 | 11.8 | 11  | ID |
| 2086 | Rambouillet | Idaho 2008 | 2 | 110  | 11  | ID |
| 2087 | Rambouillet | Idaho 2008 | 1 | 12.2 | 11  | II |
| 2088 | Rambouillet | Idaho 2008 | 4 | 12.8 | 11  | ID |
| 2089 | Rambouillet | Idaho 2008 | 2 | 121  | 11  | II |
| 2090 | Rambouillet | Idaho 2008 | 2 | 1210 | 11  | II |
| 2091 | Rambouillet | Idaho 2008 | 5 | 123  | 11  | II |
| 2092 | Rambouillet | Idaho 2008 | 2 | 13   | 11  | II |
| 2093 | Rambouillet | Idaho 2008 | 3 | 13.9 | 11  | ID |
| 2094 | Rambouillet | Idaho 2008 | 2 | 133  | 11  | II |
| 2095 | Rambouillet | Idaho 2008 | 2 | 134  | 13  | .  |
| 2096 | Rambouillet | Idaho 2008 | 3 | 14   | 11  | ID |
| 2097 | Rambouillet | Idaho 2008 | 4 | 14.2 | 11  | ID |
| 2098 | Rambouillet | Idaho 2008 | 4 | 14.3 | 110 | ID |

|             |             |            |   |       |     |    |
|-------------|-------------|------------|---|-------|-----|----|
| <b>2099</b> | Rambouillet | Idaho 2008 | 4 | 147   | 13  | ID |
| <b>2100</b> | Rambouillet | Idaho 2008 | 4 | 1490  | 11  | ID |
| <b>2101</b> | Rambouillet | Idaho 2008 | 2 | 15    | 11  | II |
| <b>2102</b> | Rambouillet | Idaho 2008 | 5 | 15    | 11  | II |
| <b>2103</b> | Rambouillet | Idaho 2008 | 4 | 15.2  | 11  | ID |
| <b>2104</b> | Rambouillet | Idaho 2008 | 3 | 15.9  | 11  | ID |
| <b>2105</b> | Rambouillet | Idaho 2008 | 4 | 1550  | 11  | .  |
| <b>2106</b> | Rambouillet | Idaho 2008 | 4 | 16.4  | 11  | ID |
| <b>2107</b> | Rambouillet | Idaho 2008 | 4 | 161   | 11  | ID |
| <b>2108</b> | Rambouillet | Idaho 2008 | 2 | 161   | 11  | II |
| <b>2109</b> | Rambouillet | Idaho 2008 | 4 | 17.3  | 11  | ID |
| <b>2110</b> | Rambouillet | Idaho 2008 | 4 | 17.7  | 11  | II |
| <b>2111</b> | Rambouillet | Idaho 2008 | 4 | 1760  | 11  | .  |
| <b>2112</b> | Rambouillet | Idaho 2008 | 3 | 178   | 11  | .  |
| <b>2113</b> | Rambouillet | Idaho 2008 | 2 | 179   | 11  | ID |
| <b>2114</b> | Rambouillet | Idaho 2008 | 5 | 18    | 11  | DD |
| <b>2115</b> | Rambouillet | Idaho 2008 | 3 | 18.4  | 11  | II |
| <b>2116</b> | Rambouillet | Idaho 2008 | 3 | 19.4  | 11  | II |
| <b>2117</b> | Rambouillet | Idaho 2008 | 5 | 190   | 11  | DD |
| <b>2118</b> | Rambouillet | Idaho 2008 | 4 | 19700 | 11  | ID |
| <b>2119</b> | Rambouillet | Idaho 2008 | 4 | 2.26  | 11  | II |
| <b>2120</b> | Rambouillet | Idaho 2008 | 4 | 2.27  | 17  | ID |
| <b>2121</b> | Rambouillet | Idaho 2008 | 3 | 2.86  | 11  | II |
| <b>2122</b> | Rambouillet | Idaho 2008 | 4 | 2.95  | 11  | II |
| <b>2123</b> | Rambouillet | Idaho 2008 | 4 | 2.97  | 11  | ID |
| <b>2124</b> | Rambouillet | Idaho 2008 | 3 | 20.1  | 11  | ID |
| <b>2125</b> | Rambouillet | Idaho 2008 | 2 | 20.1  | 11  | ID |
| <b>2126</b> | Rambouillet | Idaho 2008 | 4 | 20.6  | 11  | DD |
| <b>2127</b> | Rambouillet | Idaho 2008 | 1 | 20.7  | 11  | .  |
| <b>2128</b> | Rambouillet | Idaho 2008 | 3 | 209   | 11  | II |
| <b>2129</b> | Rambouillet | Idaho 2008 | 1 | 2100  | 11  | ID |
| <b>2130</b> | Rambouillet | Idaho 2008 | 4 | 216   | 11  | .  |
| <b>2131</b> | Rambouillet | Idaho 2008 | 4 | 223   | 11  | ID |
| <b>2132</b> | Rambouillet | Idaho 2008 | 3 | 229   | 11  | .  |
| <b>2133</b> | Rambouillet | Idaho 2008 | 4 | 23.4  | 11  | ID |
| <b>2134</b> | Rambouillet | Idaho 2008 | 3 | 248   | 13  | II |
| <b>2135</b> | Rambouillet | Idaho 2008 | 4 | 25.1  | 11  | .  |
| <b>2136</b> | Rambouillet | Idaho 2008 | 4 | 2500  | 11  | ID |
| <b>2137</b> | Rambouillet | Idaho 2008 | 4 | 251   | 110 | II |
| <b>2138</b> | Rambouillet | Idaho 2008 | 4 | 2510  | 11  | II |
| <b>2139</b> | Rambouillet | Idaho 2008 | 4 | 255   | 11  | II |
| <b>2140</b> | Rambouillet | Idaho 2008 | 2 | 26.7  | 11  | ID |
| <b>2141</b> | Rambouillet | Idaho 2008 | 4 | 27.3  | 11  | ID |

|      |             |            |   |      |     |    |
|------|-------------|------------|---|------|-----|----|
| 2142 | Rambouillet | Idaho 2008 | 4 | 276  | 11  | .  |
| 2143 | Rambouillet | Idaho 2008 | 2 | 28.9 | 11  | ID |
| 2144 | Rambouillet | Idaho 2008 | 2 | 29.9 | 11  | II |
| 2145 | Rambouillet | Idaho 2008 | 4 | 297  | 11  | II |
| 2146 | Rambouillet | Idaho 2008 | 2 | 3.14 | 11  | II |
| 2147 | Rambouillet | Idaho 2008 | 2 | 3.24 | 11  | ID |
| 2148 | Rambouillet | Idaho 2008 | 3 | 3.62 | 11  | ID |
| 2149 | Rambouillet | Idaho 2008 | 3 | 31.7 | 11  | ID |
| 2150 | Rambouillet | Idaho 2008 | 3 | 32.5 | 11  | II |
| 2151 | Rambouillet | Idaho 2008 | 4 | 32.5 | 11  | II |
| 2152 | Rambouillet | Idaho 2008 | 4 | 329  | 11  | II |
| 2153 | Rambouillet | Idaho 2008 | 4 | 33.2 | 11  | II |
| 2154 | Rambouillet | Idaho 2008 | 4 | 33.7 | 11  | ID |
| 2155 | Rambouillet | Idaho 2008 | 4 | 332  | 11  | ID |
| 2156 | Rambouillet | Idaho 2008 | 3 | 34.5 | 11  | II |
| 2157 | Rambouillet | Idaho 2008 | 2 | 34.7 | 11  | II |
| 2158 | Rambouillet | Idaho 2008 | 1 | 34.8 | 11  | ID |
| 2159 | Rambouillet | Idaho 2008 | 3 | 3420 | 11  | II |
| 2160 | Rambouillet | Idaho 2008 | 3 | 35.1 | 11  | ID |
| 2161 | Rambouillet | Idaho 2008 | 4 | 351  | 11  | ID |
| 2162 | Rambouillet | Idaho 2008 | 2 | 36.8 | 11  | II |
| 2163 | Rambouillet | Idaho 2008 | 2 | 362  | 11  | ID |
| 2164 | Rambouillet | Idaho 2008 | 2 | 3690 | 11  | ID |
| 2165 | Rambouillet | Idaho 2008 | 4 | 37.5 | 11  | ID |
| 2166 | Rambouillet | Idaho 2008 | 4 | 37.8 | 11  | II |
| 2167 | Rambouillet | Idaho 2008 | 4 | 37.8 | 11  | ID |
| 2168 | Rambouillet | Idaho 2008 | 1 | 372  | 13  | II |
| 2169 | Rambouillet | Idaho 2008 | 3 | 38.6 | 11  | II |
| 2170 | Rambouillet | Idaho 2008 | 2 | 38.9 | 11  | II |
| 2171 | Rambouillet | Idaho 2008 | 4 | 39.8 | 13  | II |
| 2172 | Rambouillet | Idaho 2008 | 2 | 4.28 | 11  | II |
| 2173 | Rambouillet | Idaho 2008 | 4 | 4.29 | 11  | ID |
| 2174 | Rambouillet | Idaho 2008 | 3 | 4.3  | 110 | II |
| 2175 | Rambouillet | Idaho 2008 | 5 | 4.45 | 11  | ID |
| 2176 | Rambouillet | Idaho 2008 | 3 | 4.91 | 11  | II |
| 2177 | Rambouillet | Idaho 2008 | 4 | 40.4 | 11  | DD |
| 2178 | Rambouillet | Idaho 2008 | 4 | 400  | 11  | ID |
| 2179 | Rambouillet | Idaho 2008 | 2 | 405  | 11  | ID |
| 2180 | Rambouillet | Idaho 2008 | 4 | 405  | 11  | ID |
| 2181 | Rambouillet | Idaho 2008 | 3 | 413  | 11  | ID |
| 2182 | Rambouillet | Idaho 2008 | 4 | 44.2 | 11  | II |
| 2183 | Rambouillet | Idaho 2008 | 3 | 44.4 | 11  | ID |
| 2184 | Rambouillet | Idaho 2008 | 5 | 4440 | 11  | II |

|      |             |            |   |      |     |    |
|------|-------------|------------|---|------|-----|----|
| 2185 | Rambouillet | Idaho 2008 | 3 | 449  | 11  | II |
| 2186 | Rambouillet | Idaho 2008 | 4 | 45.5 | 13  | II |
| 2187 | Rambouillet | Idaho 2008 | 4 | 48.4 | 11  | DD |
| 2188 | Rambouillet | Idaho 2008 | 1 | 48.4 | 11  | ID |
| 2189 | Rambouillet | Idaho 2008 | 2 | 49.7 | 11  | II |
| 2190 | Rambouillet | Idaho 2008 | 4 | 5.79 | 11  | II |
| 2191 | Rambouillet | Idaho 2008 | 5 | 5.87 | 11  | DD |
| 2192 | Rambouillet | Idaho 2008 | 2 | 50   | 11  | II |
| 2193 | Rambouillet | Idaho 2008 | 4 | 500  | 11  | II |
| 2194 | Rambouillet | Idaho 2008 | 3 | 504  | 11  | DD |
| 2195 | Rambouillet | Idaho 2008 | 3 | 52   | 11  | ID |
| 2196 | Rambouillet | Idaho 2008 | 3 | 53.1 | 11  | ID |
| 2197 | Rambouillet | Idaho 2008 | 4 | 54   | 11  | .  |
| 2198 | Rambouillet | Idaho 2008 | 2 | 54.7 | 11  | .  |
| 2199 | Rambouillet | Idaho 2008 | 2 | 55.2 | 11  | II |
| 2200 | Rambouillet | Idaho 2008 | 4 | 5620 | 11  | .  |
| 2201 | Rambouillet | Idaho 2008 | 4 | 589  | 11  | II |
| 2202 | Rambouillet | Idaho 2008 | 2 | 6.04 | 11  | II |
| 2203 | Rambouillet | Idaho 2008 | 4 | 6.36 | 11  | ID |
| 2204 | Rambouillet | Idaho 2008 | 4 | 6.64 | 11  | ID |
| 2205 | Rambouillet | Idaho 2008 | 3 | 6.95 | 11  | II |
| 2206 | Rambouillet | Idaho 2008 | 4 | 60.3 | 11  | ID |
| 2207 | Rambouillet | Idaho 2008 | 2 | 60.4 | 11  | II |
| 2208 | Rambouillet | Idaho 2008 | 1 | 60.6 | 11  | II |
| 2209 | Rambouillet | Idaho 2008 | 4 | 60.8 | 11  | .  |
| 2210 | Rambouillet | Idaho 2008 | 3 | 61.2 | 11  | ID |
| 2211 | Rambouillet | Idaho 2008 | 4 | 610  | 11  | II |
| 2212 | Rambouillet | Idaho 2008 | 5 | 64   | 11  | ID |
| 2213 | Rambouillet | Idaho 2008 | 3 | 64.2 | 11  | ID |
| 2214 | Rambouillet | Idaho 2008 | 4 | 64.4 | 13  | II |
| 2215 | Rambouillet | Idaho 2008 | 4 | 655  | 11  | DD |
| 2216 | Rambouillet | Idaho 2008 | 4 | 66   | 11  | II |
| 2217 | Rambouillet | Idaho 2008 | 2 | 66.8 | 11  | II |
| 2218 | Rambouillet | Idaho 2008 | 3 | 67   | 11  | ID |
| 2219 | Rambouillet | Idaho 2008 | 2 | 7.01 | 110 | II |
| 2220 | Rambouillet | Idaho 2008 | 4 | 70.1 | 11  | ID |
| 2221 | Rambouillet | Idaho 2008 | 4 | 70.8 | 11  | DD |
| 2222 | Rambouillet | Idaho 2008 | 4 | 744  | 110 | ID |
| 2223 | Rambouillet | Idaho 2008 | 5 | 79   | 11  | .  |
| 2224 | Rambouillet | Idaho 2008 | 4 | 792  | 11  | ID |
| 2225 | Rambouillet | Idaho 2008 | 3 | 8.14 | 11  | II |
| 2226 | Rambouillet | Idaho 2008 | 2 | 8.56 | 11  | .  |
| 2227 | Rambouillet | Idaho 2008 | 2 | 85.9 | 11  | II |

|             |             |            |   |      |    |    |
|-------------|-------------|------------|---|------|----|----|
| <b>2228</b> | Rambouillet | Idaho 2008 | 3 | 87.3 | 11 | ID |
| <b>2229</b> | Rambouillet | Idaho 2008 | 4 | 9.86 | 11 | II |
| <b>2230</b> | Rambouillet | Idaho 2008 | 5 | 90.9 | 11 | ID |
| <b>2231</b> | Rambouillet | Idaho 2008 | 4 | 91.1 | 11 | II |
| <b>2232</b> | Rambouillet | Idaho 2008 | 5 | 92   | 11 | II |
| <b>2233</b> | Rambouillet | Idaho 2008 | 5 | 9550 | 13 | ID |
| <b>2234</b> | Rambouillet | Idaho 2008 | 4 | 967  | 11 | II |
| <b>2235</b> | Rambouillet | Idaho 2008 | 2 | 98.2 | 11 | II |
| <b>2236</b> | Rambouillet | Idaho 2008 | 4 | 993  | 11 | DD |

II: Insertion homozygote

DD: Deletion homozygote

ID: Insertion-Deletion heterozygote

.: Data missing
